1 **A dynamic and combinatorial histone code drives malaria parasite asexual and**  
2 **sexual development**

3

4 Hilde von Grüning<sup>1,2</sup>, Mariel Coradin<sup>3,5</sup>, Mariel R. Mendoza<sup>3</sup>, Janette Reader<sup>1</sup>,  
5 Simone Sidoli<sup>4</sup>, Benjamin A. Garcia<sup>3</sup>, Lyn-Marie Birkholtz<sup>1,2\*</sup>

6 <sup>1</sup> Department of Biochemistry, Genetics and Microbiology, University of Pretoria, Private bag X20,  
7 Hatfield, Pretoria, South Africa.

8 <sup>2</sup> Institute for Sustainable Malaria Control, University of Pretoria, Private bag X20, Hatfield, Pretoria,  
9 South Africa.

10 <sup>3</sup> Epigenetics Institute, Department of Biochemistry and Biophysics, Perelman School of Medicine,  
11 University of Pennsylvania, Philadelphia, PA 19104, USA.

12 <sup>4</sup> Department of Biochemistry, Albert Einstein College of Medicine, Bronx, NY 10461, USA.

13

14 Current address:

15 <sup>5</sup> Department of Molecular, Cellular, and Developmental Biology, University of Colorado Boulder,  
16 Boulder, CO 80309, USA.

17

18 \* Corresponding author: L Birkholtz

19 Email: [lbirkholtz@up.ac.za](mailto:lbirkholtz@up.ac.za)

20 Tel: +27 12 420 2479

21

22

23

24 **Keywords:** Gametocyte, histone code, malaria, middle-down mass spectrometry proteomics,  
25 parasite, *Plasmodium falciparum*, post-translational modification, PTM

26

27 **Running title:** Histone code in malaria parasites

28

29 **Abstract**

30 A 'histone code' defines system-level crosstalk between histone post-translational  
31 modifications (PTMs) to induce specific biological outcomes. Proteome-scale  
32 information of co-existing PTM across the entire chromatin landscape of the malaria  
33 parasite, *Plasmodium falciparum*, was lacking. Here, we used advanced quantitative  
34 middle-down proteomics to identify combinations of PTMs in both the proliferative,  
35 asexual stages and transmissible, sexual gametocyte stages of *P. falciparum*. We  
36 provide an updated, high-resolution compendium of 72 PTMs on H3 and H3.3, of  
37 which 30 are novel to the parasite. Co-existing PTMs with unique stage distinction  
38 was identified, indicating a dynamic and complex histone code with increased  
39 connectivity of novel PTMs seen in gametocytes. Chromatin proteomics of a  
40 gametocyte-specific combination, H3R17me2K18acK23ac, identified a SAGA-like  
41 effector complex (including the transcription factor AP2-G2) tied to this combination  
42 to regulate gene expression in mature gametocytes. Ultimately, this study unveils  
43 previously undiscovered histone PTMs and their functional relationship with co-  
44 existing partners. These results highlight that investigating chromatin regulation in  
45 the parasite using single histone PTM assays might overlook higher order gene  
46 regulation for distinct proliferation and differentiation processes.

47

48

49

## 50 Introduction

51 Histone N-terminal tails are reversibly modified by an array of covalent histone post-  
52 translational modifications (PTMs). These alter chromatin structure to fine tune gene  
53 expression in most eukaryotes, resulting in changes in cell fate. Although the  
54 contribution of individual histone PTMs in particular biological processes are well  
55 described (Berger, 2002; Zhao Y. & Garcia, 2015), there is growing evidence to  
56 indicate that histone PTMs not only function individually, but also act in a concerted  
57 manner to direct transcriptional programmes according to the cell's immediate  
58 needs. The outcome of such coordination ultimately define a cell's fate and function  
59 (Turner, 2000), such as to proliferate (Klein *et al.*, 2019; Schwammle *et al.*, 2016),  
60 differentiate (Bhanu *et al.*, 2016; Chen T. & Dent, 2014), or become quiescent (Liu *et*  
61 *al.*, 2013; Young C.P. *et al.*, 2017). This association between histone PTMs that work  
62 in coordination has been postulated to constitute a functionally-relevant, unique  
63 pattern or 'histone code' (Jenuwein & Allis, 2001; Strahl & Allis, 2000).

64 As example of the importance of histone PTM crosstalk, the presence of histone H3,  
65 serine 10 phosphorylation (H3S10ph) impairs the binding of the effector protein  
66 heterochromatin protein 1 (HP1) to the well-known repressive PTM, H3K9me3  
67 (Hirota *et al.*, 2005). This blocks cellular differentiation in mouse embryonic stem  
68 cells (Fischle *et al.*, 2005; Johansen & Johansen, 2006). Such drastic changes in  
69 gene regulation and cellular fate can also be effected by combinations of PTMs that  
70 include typically less abundant PTMs e.g. H3K9ac and H3K14ac affect H3R8me2  
71 (Fulton *et al.*, 2018; Kirmizis *et al.*, 2007).

72 The histone PTM landscape in the causative agent of severe malaria in humans,  
73 *Plasmodium falciparum*, is associated with a dynamic abundance profile of individual  
74 PTMs that changes during various developmental stages of the parasite (Coetzee *et*  
75 *al.*, 2017) and contributes to a tightly controlled transcriptional programme (Hollin &  
76 Le Roch, 2020). Several of the individual histone PTMs are essential to various  
77 biological processes, as demonstrated by gene knockout or chemical perturbation of  
78 histone 'writer' and 'eraser' enzymes responsible for histone PTM placement and  
79 removal, respectively, detrimental to parasite development (Coetzee *et al.*, 2020;  
80 Zhang *et al.*, 2018).

81 The parasite undergoes rapid rounds of cell division during its asexual replication to  
82 proliferate every ~48 h. A small percentage of asexual parasites differentiate to  
83 gametocytes through five distinct stages of development (stages I-V) over ~14 days  
84 in *P. falciparum*, after which mature male and female stage V gametocytes can be  
85 transmitted to the mosquito vector (Josling *et al.*, 2018; Maier *et al.*, 2019). The  
86 parasite's chromatin organisation fluctuates between mostly euchromatic in asexual  
87 parasites, characterised by transcriptionally permissive PTMs of H3K9ac and  
88 H3K4me3 (Bartfai *et al.*, 2010; Bozdech *et al.*, 2003; Salcedo-Amaya *et al.*, 2009),  
89 and more heterochromatic states during gametocytogenesis, marked with H3K9me3,  
90 H4K20me3 and extended HP1 occupancy (Coetzee *et al.*, 2017; Flueck *et al.*, 2009).  
91 However, nuanced distinctions exist between the different developmental stages  
92 during gametocytogenesis and underscores the transcriptional differences between  
93 the early- (stage II/III) and late-stage (stage IV/V) gametocytes (van Biljon *et al.*,  
94 2019). Typical heterochromatic PTMs such as H3K27me3 and H3K36me3 are  
95 exclusive to the immature, early stages (Coetzee *et al.*, 2017; Connacher *et al.*,  
96 2021) whilst more mature stages do contain euchromatic PTMs (H3K4me3 and  
97 H3K79me3) in preparation for onwards transmission and gamete formation (Coetzee  
98 *et al.*, 2017).

99 Evidence of histone PTM combinations in *P. falciparum* is sparse but includes  
100 methylation of H3K4 or H3K9 by the histone lysine N-methyltransferase SET7, only  
101 in the presence of already acetylated H3K14 (Chen P.B. *et al.*, 2016). H4K8ac, as a  
102 likely regulator of parasite proliferation in asexual parasites (Gupta *et al.*, 2017), is  
103 also found in combination with H4K5ac, H4K12ac and H4K16ac as a result of the  
104 acetyltransferase activity of MYST (Miao *et al.*, 2010). Quantitative chromatin  
105 proteomics alluded to the presence of additional co-existing histone PTMs in *P.*  
106 *falciparum* parasites, with prominent stage specificity and increased presence during  
107 gametocytogenesis (Coetzee *et al.*, 2017; Saraf *et al.*, 2016).

108 The majority of co-existing histone PTM pairs are typically identified with a peptide-  
109 centric proteomics pipeline, frequently named "bottom-up". Histones are digested  
110 with trypsin or other enzymes that generate relatively short peptides prior MS  
111 analysis. With this workflow, co-occurrences between histone PTMs can be identified  
112 only for those which localize nearby in the amino acid sequence. However, this  
113 proteomic approach is not suitable for distal co-occurring PTMs. As such,

114 distinctively modified peptides and co-occurring PTMs cannot be accurately  
115 identified and quantified (Janssen *et al.*, 2019). The development of “middle-down”  
116 MS has advanced proteomics and allowed the complexity of PTM combinations to  
117 be investigated (Sidoli & Garcia, 2017). Although technically challenging, middle-  
118 down MS allows evaluation of longer histone tails of ~50-60 residues (Sidoli *et al.*,  
119 2016a; Sidoli *et al.*, 2017) to accurately and simultaneously identify and quantify  
120 hundreds of combinatorial PTMs (Moradian *et al.*, 2014; Sidoli *et al.*, 2017). With this  
121 powerful approach, system-level crosstalk of multiple, interacting co-existing PTMs  
122 defined clear, combinatorial histone codes in nematodes (Sidoli *et al.*, 2016b),  
123 mammalian cells (Schwammle *et al.*, 2016; Sidoli *et al.*, 2017; Tvardovskiy *et al.*,  
124 2017; Tvardovskiy *et al.*, 2015), cells undergoing epithelial to mesenchymal  
125 transition (Garabedian *et al.*, 2018; Jiang T. *et al.*, 2018; Schröder *et al.*, 2018; Sidoli  
126 *et al.*, 2017; Sweredoski *et al.*, 2017) and stem cell reprogramming (Benevento *et al.*,  
127 2015).

128 Here, we present the systems-level identification and characterisation of the  
129 combinatorial histone code of *P. falciparum* parasites, which was generated using  
130 quantitative, middle-down proteomics. We identify a comprehensive histone code  
131 that is dynamic and has distinct fingerprints in different life cycle stages, implying  
132 refined functions to allow different biological outcomes associated with parasite  
133 pathology and survival. Several co-existing PTMs are involved in direct crosstalk,  
134 indicative of coordinated function, particularly in gametocytes, with the code in  
135 immature gametocytes being most connected and mature gametocytes using unique  
136 combinations. This is exemplified by the functional association of H3K18ackK23ac  
137 that interacts with a unique reader complex in mature gametocytes to enable  
138 strategy-specific gene expression. With this first, comprehensive report of a  
139 combinatorial histone code in a eukaryotic parasite, we show that *P. falciparum*  
140 relies on dynamic interactions between histone PTMs for development and  
141 differentiation. This data could serve as a model for the importance of combinatorial  
142 histone PTMs in pathogenesis in protista.

## 143 Results

144

### 145 ***Adapting middle-down proteomics for P. falciparum parasites***

146 To investigate the presence of co-existing histone PTMs with middle-down  
147 proteomics, we isolated parasites as enriched trophozoites ( $92 \pm 0.9\%$ ), immature  
148 early-stage gametocytes ( $83 \pm 3.1\%$  stage III gametocytes,  $14 \pm 2.2\%$  stage II), and  
149 mature gametocytes ( $94 \pm 2.9\%$  stage V), to allow stage-specific differences to be  
150 inferred (Fig 1A). All samples yielded  $> 300\,000$  cells / sample, resulting in sufficient  
151 yields of acid-soluble nuclear protein fractions containing the histones:  $17 \pm 1.1\ \mu\text{g}$   
152 for the trophozoite population and  $58 \pm 10\ \mu\text{g}$  and  $70 \pm 16\ \mu\text{g}$  for the immature and  
153 mature gametocytes, respectively (Fig EV1A).

154 An optimised middle-down proteomics workflow was established to accurately  
155 identify and quantify individual and combinatorial histone PTMs at scale (Fig  
156 1B)(Coradin *et al.*, 2020; Holt *et al.*, 2019). The native histones from each sample  
157 were digested with GluC endoproteinase to produce polypeptide fragments of  $\sim 50$ -  
158  $60$  amino acids in length ( $\geq 5$  kDa) that were separated and identified by high-  
159 resolution nano liquid chromatography-MS/MS; data processing and peak extraction  
160 was performed with in-house developed tools, ProteoFormQuant and HistoneCoder  
161 (Greer *et al.*, 2018; Jung *et al.*, 2013). Unique PTMs (with a false discovery rate  
162 [FDR]  $< 1\%$ ) with sufficient fragment ions (Fig EV1B) were accurately quantified, with  
163 a coefficient of variance  $\leq 33\%$  and average Pearson  $r^2=0.69$  between biological  
164 replicates (Fig EV1C), allowing comparison of PTM quantities between samples. To  
165 ensure differentiation of isobaric peptides as a result of the middle-down proteomics,  
166 data-dependent acquisition data were further processed using isoScale Slim (Sidoli  
167 *et al.*, 2017), that extracts the total fragment ion intensity of histone tail spectra as  
168 representative of their abundance, and it discriminates isobaric forms using unique  
169 site-specific fragment ions using the principle of the fragment ion relative ratio (FIRR)  
170 (Pesavento *et al.*, 2006). From the accurately identified and quantified histone PTMs  
171 per peptide, co-existing frequency was calculated for the observed presence of  
172 combinatorial PTMs (from MS2 level evidence) as a function of predicted co-  
173 existence frequencies, defined as an 'interplay score' (Sidoli *et al.*, 2014).

174

175 ***A high-resolution, quantitative compendium of histone PTMs in Plasmodium***  
176 ***from middle-down proteomics***

177 The high-resolution, sensitive nature of middle-down proteomics allowed successful  
178 identification and quantification of 83 PTMs on histone H2B.Z, H3 and H3.3 (Fig 2),  
179 as only these histones have GluC cut sites on their N-terminal histone tail (Coradin  
180 *et al.*, 2020). Mass tolerance was set at 30 ppm to accurately distinguish between  
181 lysine acetylation (42.011 Da) and lysine trimethylation (42.047 Da) as previously  
182 determined (Sidoli *et al.*, 2014). 72 of the 83 identified PTMs were confidently  
183 quantified; the others were only detected but with a signal insufficient to assess an  
184 abundance (Fig 2). As no enrichment was performed for phosphorylations, these  
185 could not be quantified. A few PTMs previously identified with H2B.Z (K14ac, T30ac,  
186 K42ac), H3 (S10ac, S10ph, S28ph, S32ph) and H3.3 (S10ac, T11ac, S22ac, S28ph,  
187 S32ph) could not be confirmed (Coetzee *et al.*, 2017; Saraf *et al.*, 2016). Since these  
188 PTMs were only previously qualitatively described, their presence remains to be  
189 confirmed.

190 Of the 83 PTMs identified (Fig 2), 35 were described for the first time in *P. falciparum*  
191 parasites, of which 30 could be accurately quantified. As expected, the rarely  
192 observed variant H2B had the least number of PTMs. This included six known PTMs  
193 but also one novel PTM (H2B.ZK18me3, Fig EV2). Histone H3 contained 40 PTMs  
194 of which 33 was accurately quantified, including 13 novel PTMs. These include  
195 acetylation and methylation of H3K37, and methylation of several arginines  
196 (H3R8me1/2, H3R26me1, H3R40me2, H3R42me1 and H3R49me1). Several PTMs  
197 displayed high relative abundances (>20%) in more than two stages (e.g. H3K4me3,  
198 H3K14ac, H3R17me1, H3K18me1, H3K37me1 and H3R40me1), with the novel  
199 PTM, H3K37me1, highly abundant in immature gametocytes ( $70 \pm 6\%$ ) (Fig 2).  
200 These changes in abundance levels between stages is also evident for H3K4me3,  
201 H3R17me2 and H3R40me1, which increased significantly from trophozoites to  
202 immature gametocytes ( $P \leq 0.01$ ,  $n \geq 2$ , Fig EV3). Histone H3.3 contained 37 PTMs  
203 (33 quantified) with substantially higher abundances of PTMs modified in both  
204 gametocyte stages compared to asexual parasites than seen for H3. Methylation  
205 PTMs were again abundant including H3.3K4me1/3, H3.3K18me3, H3.3R17me2  
206 and H3.3R40me1, with H3.3K37me3 significantly increased abundance in mature  
207 gametocytes ( $P \leq 0.01$ ,  $n=2$ , Fig EV3).

208 Collectively, we demonstrate that middle-down MS identified >80 unique PTMs and  
209 quantified 88% thereof. This includes 30 novel modifications, thereby providing an  
210 updated, high-resolution compendium of histone modifications across multiple life  
211 cycle stages of *P. falciparum*.

212

### 213 ***A stage-specific combinatorial histone PTM code exists in P. falciparum*** 214 ***parasites***

215 The middle-down proteomics dataset was used to identify and quantify co-existing  
216 PTMs on H3 and H3.3 across the three life cycle stages of *P. falciparum*. On  
217 average, three co-existing PTMs were present on any given peptide for both H3 and  
218 H3.3 (Fig 3A), similar to what is seen for these two histones in humans and mice  
219 (Garcia *et al.*, 2007; Tweedie-Cullen *et al.*, 2012; Young N.L. *et al.*, 2009). H3.3 is  
220 the exception, with on average only two co-existing PTMs present in trophozoites but  
221 as many as seven (e.g. H3K4me1R8me1K9me1K14acR17me1K18acK37me1) in  
222 immature gametocytes (Appendix 1).

223 Stage-stratification was clearly evident in the histone PTM combinations, with  
224 immature gametocytes displaying the highest proportion of unique combinations  
225 (42%) on H3, with only a minor proportion (9%) of combinations shared between  
226 asexual parasites, immature and mature gametocytes (Fig 3B). Stage-specific  
227 diversity was somewhat less evident for H3.3 (Fig 3B), with a markedly decreased  
228 number of co-existing PTMs present in trophozoites for this histone (Fig 3C). The  
229 stage-stratification was characterised by changes in the identity of the most  
230 prevalent combinations. Trophozoites are characterised by a large number of  
231 combinations involving H3K14ac, H3K4me3, H3K9me2, and novel PTMs H3K37me1  
232 and H3R17me1. These include the well-characterised, known combination of the  
233 archetypical euchromatic PTMs H3K4me3 and H3K9ac (Cui & Miao, 2010; Salcedo-  
234 Amaya *et al.*, 2009), with H3K14ac due to the coordinated action of SET7 (Chen  
235 P.B. *et al.*, 2016) and the histone acetyltransferase GCN5 (Fan *et al.*, 2004a, b). In  
236 gametocytes, the novel PTMs H3K37me1 and H3R40me1 are involved in the  
237 highest number of co-existing PTMs, with further specification seen between  
238 immature gametocytes (with frequent interactions with H3R17me1&2 present) and  
239 mature gametocytes (higher connectivity for H3K14ac and H3K4me3 than



240 H3R17me1). Combinations involving H3R42me1 occurred exclusively in  
241 gametocytes. Arginine methylation may therefore well make up a key component of  
242 the histone code in *P. falciparum* parasites along with other histone PTMs,  
243 particularly for gametocyte stages.

244 This data indicates that histones are rarely modified by single PTMs. Most  
245 frequently, co-existing modifications dictate chromatin fine tuning. As well, these  
246 histones codes are re-arranged in position and type of modifications in different life  
247 cycle stages of the malaria parasite. The most frequent combinations in gametocytes  
248 diverge from those trophozoites, with immature gametocytes associated with the  
249 highest number of co-existing PTMs ascribed to the presence of novel PTMs. The  
250 parasite therefore employs a unique and diverse set of PTM combinations likely to  
251 guide stage-specific gene expression.

252

### 253 ***Histone PTM pairs display unique crosstalk to assert function***

254 The extent and relevance of the influence between pairs of co-existing PTMs was  
255 subsequently interrogated by quantifying the co-existing frequency as an interplay  
256 score (IS) for bivalent combinations (Appendix 2). This provides a metric to predict  
257 the likelihood of individual pairs of histone PTMs to either: 1) have a positive  
258 interplay score to indicate co-dependence on one another, suggesting that one PTM  
259 require the presence of another PTM to exert its biological function (Kirsch *et al.*,  
260 2020; Schwammle *et al.*, 2014; Sidoli *et al.*, 2014); or 2) have a negative interplay  
261 score to indicate mutual exclusivity and/or functional independence (Hunter,  
262 2007)(Fig 4). If two PTMs are randomly deposited on the chromatin in an  
263 independent manner, they will have an interplay score close to zero.

264 A third of all co-existing histone PTMs had similar connectivity and co-existing  
265 frequency profiles between all three stages of development of *P. falciparum* (Fig 4).  
266 Of these, 11 combinations show negative interplay scores throughout development  
267 (Fig 4A), which includes multiple combinations of the repressive PTM H3K9me3. For  
268 example, this PTM is found on the same histone molecule with H3K14ac significantly  
269 more rarely than stochastic co-occurrence in all three stages, implying mutual  
270 exclusion and thus opposing biological functions. The typically euchromatic signal of  
271 H3K14ac is therefore negated in the event of H3K9me3, and this contributes to the

272 HP1-bound heterochromatic state as described for certain gene sets (Brancucci *et*  
273 *al.*, 2014; Flueck *et al.*, 2009; Perez-Toledo *et al.*, 2009). This combination is found  
274 also in differentiated stem cells (Gonzales-Cope *et al.*, 2016) where H3K9me3 act as  
275 a barrier to cell reprogramming induced in pluripotent stem cells, regardless of the  
276 presence of the activating H3K14ac PTM (Chen J. *et al.*, 2013). All other  
277 combinations with H3K9me3 have negative interplay scores (Fig EV4). H3K9me3  
278 therefore acts autonomously, independent of association with any other acetylation  
279 or methyl PTMs and not influenced by *P. falciparum* life cycle development. This  
280 feature of H3K9me3 is supported in other cell types where H3K9me3 act to  
281 reprogram the identify of various cell types (Becker *et al.*, 2016; Nicetto & Zaret,  
282 2019).

283 Several PTMs (45) display positive interplay throughout development, implying  
284 coordinated function or co-dependence including H3R17me2, H3K14me1 and  
285 H3R40me1 found in various combinations with partner PTMs, particularly  
286 H3K4me2/3 (Fig 4A, Fig EV4). These marks therefore likely never function on their  
287 own and needs interaction with one (or more) PTMs throughout parasite  
288 development. Interestingly, a number of these marks show increased positive  
289 interplay scores in mature gametocytes, suggesting that these combinations are  
290 increasingly critical these parasites. H3K14ac remains co-dependent on H3K9ac as  
291 seen before for asexual parasites (Fan *et al.*, 2004a, b) with pronounced  
292 dependency evident in gametocytes here (Fig 4); indeed, the effector protein, GCN5  
293 is expressed in all three stages investigated including mature gametocytes (Lopez-  
294 Barragan *et al.*, 2011).

295 A set of 12 combinations are found in all three life cycle stages, yet have a  
296 diametrically opposed profile between gametocytes (strong positive interplay scores)  
297 and asexual parasites (strong negative interplay) (Fig 4B, Fig EV4). This includes a  
298 number of combinations involving H3K9me2, H3K36me1 and H3K18me1. The  
299 repressive mark H3K9me2 associates with several other marks (e.g. R17me1,  
300 K18me1, K36me1, K37me1 and R40me1), all of which show co-dependency only in  
301 mature gametocytes. The strongest differential interplay score between asexual and  
302 gametocytes was observed for H3K4me3K23me1. This novel combination is  
303 mutually exclusive in trophozoites, supporting the fact that H3K4me3 participates in  
304 crosstalk with H3K9ac in asexual parasites (Salcedo-Amaya *et al.*, 2009). The strong

305 co-dependence of H3K4me3K23me1 is therefore likely important for gametocyte-  
306 specific biological processes; the combination of the euchromatic H3K4me3 with  
307 H3K23me1 methylation has been associated with heterochromatin in *C. elegans*  
308 (Vandamme *et al.*, 2015).

309 The conserved nature of these co-existing marks across all life cycle stages of *P.*  
310 *falciparum* imply shared importance to parasite biology.

311

### 312 ***A dynamic histone code describes crosstalk with stage-specific biology in P.*** 313 ***falciparum***

314 Several PTMs show a crosstalk profile that is uniquely associated with a specific  
315 parasite life cycle stage (Fig 5). In trophozoites, the majority of the PTM  
316 combinations had negative interplay scores, suggesting that these PTMs antagonize  
317 each other, and are thus mutually exclusive. Combinations including novel arginine  
318 methylation marks like H3K14me2R17me1, show the strongest negative interplay  
319 scores (IS=-3.7), suggesting that these marks act with different biological roles from  
320 each other in trophozoites (Fig 5A). In fact, both H3R40me1 and H3R17me1 mostly  
321 show pronounced negative interplay scores for the majority of their interactions in  
322 trophozoites. Whilst H3R17me1 is activating as de-repressor in mammalian cells  
323 (Miller & Grant, 2013), H3R40me1 has only previously been reported in a few  
324 organisms including yeast where it required for efficient sporulation, similar to  
325 spermatogenesis in higher eukaryotes (Govin *et al.*, 2010; Huang & Hull, 2017),  
326 while in cancer cells (Li Q.Q. *et al.*, 2017), *C. elegans* (Sidoli *et al.*, 2016b) and  
327 murine embryonic stem cells, its function is unknown (Sidoli *et al.*, 2014).

328 Several important co-dependent interactions with positive interplay scores were  
329 identified in trophozoites, the majority of which involved H3K9ac (e.g. H3K9acK14ac  
330 IS = 2.8; H3K4me3K9ac IS= 2.9; and H3K9acK36me3) to produce the global  
331 euchromatic signal associated with asexual parasites (Bartfai *et al.*, 2010; Salcedo-  
332 Amaya *et al.*, 2009). H3K9acK36me3 has the strongest positive interplay score  
333 (IS=4.3) and both H3K9ac and H3K36me3 have been independently linked to *var*  
334 gene transcription (Bartfai *et al.*, 2010; Connacher *et al.*, 2021; Jiang L. *et al.*, 2013;  
335 Karmodiya *et al.*, 2015; Rando, 2007); this co-dependence supports their function in  
336 *var* gene expression.

337 The crosstalk profile in immature gametocytes is more complex, with a larger  
338 number of PTMs involved in positive crosstalk, the majority of which involve  
339 methylation marks (Fig 5B). The novel mark H3K14me2 displays the largest number  
340 of interactions with positive crosstalk, including that with H3K9ac (IS=6), H3K9me1  
341 (IS=4.9) and with both K18me1&2 (IS~5). These associations are influenced by the  
342 level of methylation (i.e. mono-, di- or trimethylation) to define chromatin states and  
343 active genes vs. inactive genes within the same locus (Karachentsev *et al.*, 2007;  
344 Schneider *et al.*, 2004; Wang *et al.*, 2018), with H3K14me1 for instance in negative  
345 crosstalk with H3K18me2, compared to the positive crosstalk seen for H3K14me2  
346 with H3K18me2. H3K14me2 is likely a repressive mark, similar to the important  
347 silencing function of H3K14me3 that mark a set of zinc finger protein genes during  
348 trans-differentiation of bone marrow cells into hepatocytes (Liao *et al.*, 2015; Zhao B.  
349 *et al.*, 2018). The co-dependency with H3K14me2K9me1 (with H3K9me1 as key  
350 PTM in the establishment of functional heterochromatin (Grewal & Rice, 2004) and  
351 the novel mark H3K14me2K18me1/2, marks H3K14me2 as a key modulator of gene  
352 regulation within immature gametocytes, to potentially mediate the establishment of  
353 a heterochromatic state.

354 Amongst the novel arginine PTMs in immature gametocytes, H3R17me2 show  
355 positive interplay particularly with H3R8me2 (IS = 4.1, correlated only with active  
356 histone PTMs (Dong *et al.*, 2018) and H3K4me1 (IS = 3.6, enhancer associated  
357 activation mark (Bae & Lesch, 2020), with the latter also positively connected  
358 (H3K4me1R8me2, IS = 3.97). H3R17me2 is a typical activation mark in eukaryotes  
359 (Di Lorenzo & Bedford, 2011; Vanagas *et al.*, 2020; Wu & Xu, 2012) and the  
360 coordination with the two other activation marks indicate that these combinations  
361 may be involved in specific activation processes. Interestingly, changing H3R17  
362 methylation from di- to monomethylation, results in positive interactions with  
363 H3K14me2 (IS = 3.59) but also a strong negative interaction with H3K9me3 (IS = -  
364 5.33), implying independence of H3R17me1 from H3K9me3. Furthermore, in  
365 immature gametocytes, H3R40me1 again show strong negative interplays,  
366 particularly with H3K37me1 (IS = -7) and H3K18me2 (IS= -2.8), confirming its  
367 independent action in immatures gametocytes, similar to in trophozoites. Overall,  
368 immature gametocytes use highly connected and co-dependant repressive lysine  
369 PTMs pairs to induce a more heterochromatic state compared to asexual parasites.

370 However, the majority of arginine PTM coordinate positively and could result in  
371 activation of subsets of genes.

372 Mature gametocytes have a combinatorial profile similar to immature gametocytes  
373 with largely positive interplays scores (Fig 5C), although the frequency of the  
374 combinations somewhat differ from those in immature gametocytes. H3R40me1  
375 remains highly connected in mature gametocytes, again showing independence from  
376 other co-existing marks. Activating H3R17me2 is most connected PTM in mature  
377 gametocytes, retaining its interactions and co-dependency with other activating  
378 marks, H3K18ac (IS = 3.9) and H3K4me1 (IS = 5.9), and also with H3K9me2 (IS =  
379 4.8) and H3R8me2 (IS = 5.2). Mature gametocytes are, however, additionally  
380 marked by combinations that uniquely and exclusively is present only in this stage of  
381 development. This includes co-dependency between H3K27me1K36me1 (IS = 4.3).  
382 In embryonic stem cells, H3K27me1 is dependent on H3K36me1 to promote  
383 transcription (Jung *et al.*, 2013) and an increase in H3K36 methylation to di- and  
384 trimethylation negatively impacts H3K27 function and they become mutually  
385 exclusive (Ferrari *et al.*, 2014; Zheng *et al.*, 2012). H3K36me2&3 is repressive to  
386 asexual gene sets in immature gametocytes (Connacher *et al.*, 2021). The exclusive  
387 combination of H3K27me1K36me1 in mature gametocytes could therefore be  
388 predicative of transcriptional activation of genes required for parasite transmission.  
389 Additionally, H3K18ac also is in crosstalk with H3K23ac only in mature gametocytes  
390 (IS = 4.7 for H3K18acK23ac). H3K18ac independently associates to active  
391 promoters in asexual *P. falciparum* parasites (Tang *et al.*, 2020) and in human  
392 cancer cells, deacetylation of H3K18ac by SIRT7 results in transcriptional repression  
393 (Barber *et al.*, 2012). Furthermore, the co-dependency between H3K18ac, H3K23ac  
394 and H3R17me2 have been demonstrated to induce transcriptional activation in  
395 cancer cells (Daujat *et al.*, 2002) and could therefore similarly be critical for stage-  
396 specific gene expression exclusively in mature gametocytes. This coordination may  
397 be an essential requirement for subsequent gamete formation and fertilisation. The  
398 histone code in mature gametocytes may therefore result in bistable chromatin to  
399 enable a transcriptionally poised state of some genes for rapid fertilisation and  
400 sexual replication once these mature gametocytes are taken up by a feeding  
401 mosquito, and this is mediated by unique co-dependent histone PTM combinations.

402

403 ***Shared protein effectors coordinate to mediate H3K18acK23ac function in***  
404 ***mature gametocytes***

405 The unique combination of H3K18acK23ac, and the associated co-existence with  
406 H3R17me2 in mature gametocytes, warranted further investigation of the presence  
407 of shared effector proteins to promote a biological outcome of transcriptional  
408 activation associated with these combinations. To identify the protein machinery  
409 associate with these marks, we performed quantitative chromatin  
410 immunoprecipitation on crosslinked chromatin isolated from mature gametocytes,  
411 coupled with quantitative mass spectrometry (ChIP-MS, Fig 6A). The presence of  
412 both marks found in combination was validated by western blot analysis in mature  
413 gametocytes (Fig EV5A). Since an antibody against H3K18acK23ac is not  
414 commercially available, we opted to capture proteins that interact with or are  
415 recruited to both H3K18ac and H3K23ac, respectively, in two separate ChIP  
416 experiments using antibodies specific to H3K18ac and H3K23ac (Fig EV5B). We  
417 used this technique to ensure that any endogenous protein (or protein complexes) in  
418 mature gametocytes that associate with these marks is captured in its *in vivo* context  
419 (Wierer & Mann, 2016).

420 We defined proteins significantly associated with H3K18ac and H3K23ac as those  
421 with a  $\log_2$  fold change  $\geq 2$  for the ChIP population (crosslinked chromatin  
422 preparation) compared to the IgG control ChIP, at a FDR  $\leq 5\%$ . Selective enrichment  
423 of proteins for H3K18ac and H3K23ac was confirmed by: 1) the significant ( $P \leq 0.01$ )  
424 enrichment of unique peptides for low abundance proteins in the H3K18ac and  
425 H3K23ac ChIP preparations compared to the IgG sample preparations (Fig EV5C);  
426 2) significantly increased abundance of proteins in the histone PTM samples  
427 compared to the IgG samples based on relative intensity-based absolute  
428 quantification (iBAQ) (Fig EV5D,  $P \leq 0.01$ ) and lastly, 3) the enrichment in the ChIP  
429 population for chromatin associated proteins (>20% enrichment)(Batugedara *et al.*,  
430 2020), the nuclear pore proteome (Oehring *et al.*, 2012), and transcription factor  
431 interacting proteins (Singh *et al.*, 2020)(Fig EV5E).

432 We found three proteins to be strongly enriched for H3K18ac in the ChIP-MS data,  
433 compared to 46 proteins for H3K23ac (FDR < 5%,  $\log_2$  fold change  $\geq 2$  over IgG  
434 control ChIP)(Fig 6). The transcription factor AP2-G2 (PF3D7\_1408200), a protein

435 with an unknown biological function (PF3D7\_1239800), centrin-2 (PF3D7\_1446600)  
436 and DnaJ (PF3D7\_1002800) were enriched in both PTM ChIPs. Besides, the  
437 chaperone DnaJ, all of these proteins were previously implicated to be chromatin  
438 associated (Batugedara *et al.*, 2020). The gene for PF3D7\_1239800 is refractory to  
439 deletion, is likely essential for asexual parasite survival (Zhang *et al.*, 2018) and is  
440 highly expressed in mature gametocytes (Lopez-Barragan *et al.*, 2011). AP2-G2 is  
441 also essential for the successful completion of gametocyte maturation and  
442 transmission (Singh *et al.*, 2020; Xu *et al.*, 2020).

443 To further investigate the epigenetic complexes associated with H3K18ac and  
444 H3K23ac, protein-protein interaction data were used to assemble a proposed reader  
445 complex for these PTMs in mature stage gametocytes, associated with AP2-G2 (Fig  
446 6C)(Hoeijmakers *et al.*, 2019; LaCount *et al.*, 2005; Singh *et al.*, 2020) (Appendix 3).  
447 Transcription factors are indeed observed in many histone PTM-associated  
448 complexes (Hoeijmakers *et al.*, 2019) to recruit additional members of epigenetic  
449 complexes, as shown for AP2-I (Santos *et al.*, 2017). The complex included  
450 evidence for the direct interaction between GCN5 (PF3D7\_0823300), with  
451 acetyltransferase activity, and ADA2 (PF3D7\_1014600), pointing towards the  
452 involvement of a HAT SAGA-like complex. This was supported by AP2-G2 further  
453 interacting with the chromodomain-helicase-DNA-binding protein 1 homolog  
454 (PF3D7\_1023900; CHD1), which in turns interacts with PHD2 (PF3D7\_1008100), a  
455 parasite-specific PHD-finger domain containing protein with different specificity to its  
456 PHD1 partner (unable to bind e.g. H3K4me3, (Hoeijmakers *et al.*, 2019)). The  
457 nucleosome assembly protein (NAPS) and PF3D7\_1239800 also has direct  
458 interactions with PHD2. In gametocytes, H3K18acK23ac therefore associates with a  
459 GCN5-ADA2-PHD2 SAGA-like complex via the tight interaction of AP2-G2, NAPS  
460 and PF3D7\_1239800 as binding partners to this particular histone combination. Most  
461 of these proteins are predominantly expressed in male mature gametocytes  
462 compared to female gametocytes, including ADA2, PHD2, ISWI, NAPS, CHD1 and  
463 AP2-G2 (Lasonder *et al.*, 2016), implicating these proteins in downstream sex-  
464 specific chromatin structure changes.

465 AP2-G2 additionally interacts with other chromatin regulation proteins, including a  
466 chromatin assembly factor 1 subunit A (PF3D7\_0501800, CAF1A) and a ISWI  
467 chromatin-remodelling complex ATPase (PF3D7\_0624600, ISWI), which interacts

468 with a Snf2-related CBP activator (PF3D7\_0820000). Both ISWI and Snf2/CBP are  
469 homologues of the mammalian H3K18acK23ac writer and reader, p300 and TRIM24,  
470 respectively (Halasa *et al.*, 2019; Luo *et al.*, 2019; Lv *et al.*, 2017; Ma *et al.*, 2016;  
471 Tsai *et al.*, 2010). This suggest that the SAGA-like complex of *P. falciparum* has as  
472 core GCN5/ADA2/PHD2 but in gametocytes, association with the H3K18acK23ac  
473 combination includes the additional ISWI/SNF complex effectors. This cooperation  
474 between SAGA and SWI/SNF complexes is required to regulate specific  
475 transcriptional responses, as in yeast (Sanz *et al.*, 2016). Since SWI/SNF complex  
476 proteins are global nucleosomal organizers that enable the specific binding of  
477 selective transcription factors (Barisic *et al.*, 2019; Dutta *et al.*, 2017; Mohrmann *et*  
478 *al.*, 2004), their involvement could explain the recruitment of AP2-G2.

479 The involvement of Snf2/CBP further points to functionality for the crosstalk involving  
480 the neighbouring H3R17 mark, forming the H3R17me2K18acK23ac coordinating  
481 code in *P. falciparum* mature gametocytes. Arginine 17 methylation is achieved in a  
482 systematic manner: CBP first acetylates H3K18, then H3K23 and this allows the  
483 arginine methylase CARM1 to associate with chromatin to methylate H3R17  
484 (Sakabe & Hart, 2010; Yue *et al.*, 2007). H3R17me2 is associated with  
485 transcriptional activation based on the recruitment of polymerase-associated factor 1  
486 complex to initiate transcription in humans (Shishkova *et al.*, 2017; Wu & Xu, 2012),  
487 supported by the antiproliferative effects of a specific CARM1 inhibitor on multiple  
488 myeloma cell lines (Drew *et al.*, 2017; Li Y. & Seto, 2016). This suggest that in *P.*  
489 *falciparum*, this combination could be critical for mature stage gametocytes.

490 Given the shared core proteins between H3K18ac and H3K23ac and the positive  
491 crosstalk observed for this combination (and including R17me2), our data for this  
492 combination provides evidence that the combinatorial histone code of the *P.*  
493 *falciparum* parasite can recruit protein complexes unique to a combination to  
494 facilitate downstream biological processes.



## 495 Discussion

496 Here we present the first systems-level evidence of a comprehensive combinatorial  
497 histone code for various life cycle stages of the human malaria parasite, *P.*  
498 *falciparum*. Middle-down proteomics provided high-resolution quantitative data to  
499 describe the histone code in this parasite, which could function as model for other  
500 protista. Our data reveal that the combinatorial histone PTM landscape is dynamic,  
501 with clear stage-specific differentiation observed, with gametocyte stages more  
502 dependent on histone PTM crosstalk than asexual parasites.

503 Collectively, our study shed light on the difference between the asexual replicating  
504 parasite and the differentiated non-replicative gametocyte. The histone code of *P.*  
505 *falciparum* asexual parasites resembles that of lower eukaryotes, which has a simple  
506 genome organisation and fewer histone PTMs. Given the primal function it performs,  
507 elaborate epigenetic gene regulation mechanisms may not be as important to these  
508 stages, as most of the genome is in an euchromatic state and actively transcribed  
509 during proliferation. Therefore, asexual parasites use less, and mutually exclusive,  
510 histone PTMs to regulate key functions such as host immune evasion. However,  
511 gametocytes share a similar mechanism of epigenetic gene regulation with other  
512 higher-order, multicellular, eukaryotes where chromatin is predominantly condensed  
513 and highly regulated to specify the identity and purpose of a cell through multiple  
514 histone PTMs. The majority of gametocytes indicate a general positive crosstalk  
515 between histone PTMs and given the limited number of transcription factors in *P.*  
516 *falciparum* parasites, gametocytes could rather switch to a more complex epigenetic  
517 code to impress very specific regulation of its biological processes. This would  
518 suggest that at least in some stages of the parasite, epigenetic level gene control is  
519 superior to transcriptional level control.

520 The connectivity within the histone code of *P. falciparum* is characterised by the  
521 presence of novel marks, with several new arginine modifications identified. The  
522 advances in proteomics technologies such as middle-down proteomics is allowing  
523 such robust description of arginine methylation marks (Li Q.Q. *et al.*, 2017) as  
524 observed here, and this contributes to our understanding of the conserved nature of  
525 arginine methylation and its key importance to chromatin organisation throughout  
526 eukaryotes (Di Lorenzo & Bedford, 2011). We show that histone arginine methylation

527 is equally as prevalent and abundant as lysine PTMs in *P. falciparum* and these  
528 marks participate in complex crosstalk with one another, particularly in gametocytes.  
529 The presence of typically activating marks such as mono- and demethylation of  
530 H3R17 (Di Lorenzo & Bedford, 2011) and their co-dependence on other marks e.g.  
531 H3R8me2 raise interesting questions as to the importance of cooperation in  
532 activation of gene sets in gametocytes. This is extended to additional arginine  
533 methylation marks including the exclusive nature of H3R42me1 in gametocytes and  
534 the highly connected, but independently functioning H3R40me1. It is noteworthy that  
535 H3R40me1 is required as activating mark for spermatogenesis-like processes in  
536 yeast (Govin *et al.*, 2010; Huang & Hull, 2017). These marks could be similarly  
537 important for activation of male gamete gene sets, supporting the notion of  
538 transcriptionally active 'poised' states in mature gametocytes (van Biljon *et al.*, 2019)  
539 to enable onwards transmission. The importance of arginine methylation in histone  
540 PTM combinations to mediate a specific transcriptional outcome in gametocytes is  
541 therefore of interest. The parasite genome does contain the necessary machinery for  
542 arginine methylation including two putative protein arginine methyltransferases  
543 (PRMT1 [PF3D7\_1426200] and PRMT5 [PF3D7\_1361000]) and a putative histone  
544 arginine methyltransferase (CARM1/PRMT4 [PF3D7\_0811500]). Indeed, PRMT  
545 inhibitors are active against *P. falciparum* parasites (Fan *et al.*, 2009) and  
546 CARM1/PRMT4 is essential in asexual parasites (Zhang *et al.*, 2018), supporting  
547 functional importance of these marks. Protein arginine methyltransferase inhibitors  
548 are seen as promising anticancer targets (Hwang *et al.*, 2021) and could be applied  
549 in the malaria context for gametocyte-targeting, transmission-blocking compounds.

550 The connectivity of histone PTMs in the *P. falciparum* histone code is clearly  
551 associated with different developmental outcomes, similar to other eukaryotic  
552 systems requiring specialisation e.g., embryogenesis and stem cell differentiation  
553 (Atlasi & Stunnenberg, 2017; Vastenhouw & Schier, 2012). Importantly, the  
554 prevailing heterochromatic mark, H3K9me3, is highly connected but not co-  
555 dependent on any other acetylation or methylation mark across all the life cycle  
556 stages. In the absence of quantified association between H3S10ph, as co-existing  
557 mark impairing HP1 binding to H3K9me3 (Fischle *et al.*, 2005) in Plasmodia, this  
558 indicates that H3K9me3 is likely singularly important to binding of HP1 to demarcate  
559 heterochromatin in *P. falciparum*. However, gametocytes additionally use other

560 highly connected, but independently acting marks repressive marks such as  
561 H3R40me1 and H3K14me2 to likely govern strategy-specific gene inactivation, as  
562 has been described for H3K36me2/3 inactivation of gene sets typically only required  
563 in asexual parasites (Connacher *et al.*, 2021). The observation that repressive marks  
564 are highly connected but in the majority of instances show independence or mutual  
565 exclusivity to the partner PTMs questions the importance of repression in Plasmodia.  
566 The limited set of histone PTMs to enable effective transcriptional repression and  
567 induction of heterochromatin could be important to control transcript levels of  
568 particular gene sets, e.g. virulence genes in asexual parasites (Jiang L. *et al.*, 2013)  
569 but are more important during gametocytogenesis. Additional mechanisms including  
570 RNA decay may be more influential to regulate transcript levels in general (Painter *et al.*,  
571 *et al.*, 2017; Shock *et al.*, 2007).

572 Connectivity between PTMs in *P. falciparum* is evidently important for coordinated  
573 function and activation of euchromatin. Silencing PTMs usually form independent  
574 heterochromatic domains (e.g. H3K9me3), but activating marks are frequently found  
575 together. The majority of activating PTMs coordinate irrespective of life cycle stages,  
576 particularly H3K9acK14ac and explains the euchromatic permissive nature of  
577 asexual parasites, enabled by coordinated binding of effector proteins. Novel  
578 combinations such as H3K4me3K23me1 and several combinations with H3R17me1  
579 and H3R17me2 (H3K4me1, H3R8me2, H3K9me2) is pronounced during  
580 gametocytogenesis. Additionally, during these stages of unique differentiation of *P.*  
581 *falciparum*, the parasite relies on specific and differentiated combinations, including  
582 the unique H3K27me1K36me1 and H3R17me2K18acK23ac combinations seen in  
583 only mature gametocytes. The connectivity and crosstalk between histone PTMs are  
584 therefore essentially important to establish general euchromatic regions in the  
585 parasite's genome across all stages. However, crosstalk of activating marks is more  
586 prevalent in gametocytes and requires differentiation in marks used for euchromatin  
587 in these stages. This implies the use of specific histone combinations for activation of  
588 strategy-specific gene sets to mediate *P. falciparum* transmission.

589 The functional relevance of the connectivity of histone PTMS is underscored by  
590 evidence that the associated interacting proteins are also highly connected to include  
591 reader and writer proteins, 'flavoured' to specific marks (Hoeijmakers *et al.*, 2019). In  
592 this manner, the crosstalk in the PTM combinations results in recruitment of protein

593 complexes to interpret the PTM combinations and allow changes to the chromatin  
594 structure. Indeed, we show that the unique co-dependent combination in mature  
595 gametocytes, H3K18acK23ac, jointly recruits the transcription factor AP2-G2, to  
596 initiate a SAGA-like complex containing GCN5/ADA2, flavoured with K18acK23ac-  
597 specific effectors. Since co-dependency extends to the triple combination  
598 H3R17me2K18acK23ac, we provide evidence that this combination may indeed  
599 functionally associate with a gametocyte-specific SAGA-like complex to mediate  
600 stage-specific gene expression exclusively in mature gametocytes, as this  
601 combination have been demonstrated to induce transcriptional activation in cancer  
602 cells (Daujat *et al.*, 2002). The identification of AP2-G2 as immediate binding partner  
603 on the H3K18acK23ac combination suggests that in mature gametocytes, AP2-G2  
604 may act as transcriptional activator by targeting these histone PTM combinations.  
605 Investigations of the specific gene sets controlled by H3R17me2K18acK23ac and  
606 AP2-G2 in mature gametocytes are underway.

607 The histone code in *P. falciparum* is therefore diverse and dynamic to effect different  
608 combinations required for proliferation and differentiation. The complex nature of the  
609 combinations and changes in the identity of the combinations during stage transition  
610 points to this epigenetic level of regulation being a more important level of regulation  
611 that can be easily finetuned by variation in the combinations, particularly for  
612 gametocytes. With a limited set of effector proteins and only a core of ~5 full effector  
613 protein complexes characterised (Hoeijmakers *et al.*, 2019), the intricacy of the  
614 histone code indicates that indeed, combinations of histone PTMs provides the  
615 blueprint to ensure differentiation, specificity and variation to control transcriptional  
616 activation of gene sets during *P. falciparum* development.

617 In conclusion, our study contributes a comprehensive catalogue of histone PTM  
618 combinations and provide a foundation for further investigation of the increasingly  
619 intricate histone code of the *P. falciparum* parasite.

## 620 **Materials and Methods**

### 621 ***In vitro* cultivation of *P. falciparum* asexual parasites and gametocytes**

622 All *in vitro* experiments involving human blood donors and human malaria parasites  
623 holds ethics approval from the University of Pretoria Research Ethics Committee,  
624 Health Sciences Faculty (NAS332/2019). Intra-erythrocytic *P. falciparum* parasites  
625 (NF54 strain, drug sensitive) was cultivated in fresh human erythrocytes (either A<sup>+</sup> or  
626 O<sup>+</sup>) in RPMI-1640 culture medium supplemented with 25 mM HEPES (pH 7.5,  
627 Sigma Aldrich, USA), 0.2 mM hypoxanthine (Sigma Aldrich, USA), 0.024 µg/µL  
628 gentamycin (Hyclone, USA), 5 µg/µL Albumax II (Invitrogen, USA), 23.81 mM  
629 sodium bicarbonate (Sigma Aldrich, USA) and 0.2 % w/v D-glucose. Cultures was  
630 maintained with daily media change and fresh erythrocyte supplementation at 5 %  
631 haematocrit, 2 % parasitaemia under hypoxic conditions (5 % O<sub>2</sub>, 5 % CO<sub>2</sub>, 90 %  
632 N<sub>2</sub>) with moderate shaking at 37°C. Parasites were synchronised to more than 90 %  
633 rings stages with D-sorbitol. Gametocytogenesis production was initiated at 0.5%  
634 parasitaemia and at a 6 % haematocrit in a glucose-free medium under hypoxic  
635 gaseous (5 % O<sub>2</sub>, 5 % CO<sub>2</sub>, 90 % N<sub>2</sub>) conditions at 37°C without shaking (Reader *et*  
636 *al.*, 2015).

### 637 **Histone isolation**

638 Nuclei were liberated from *P. falciparum* parasites using a hypotonic buffer  
639 containing 10 mM Tris-HCl (pH 8.0), 3 mM MgCl<sub>2</sub>, 0.2 % v/v Nonidet P40, 0.25 M  
640 sucrose and a cocktail of EDTA-free cocktail of protease inhibitors. Histones were  
641 subsequently extracted from chromatin and enriched through incubation with of 0.25  
642 M hydrochloric acid. Histones were precipitated using 20 % trichloroacetic acid and  
643 rinsed with acetone air-dried and reconstituted using dddH<sub>2</sub>O. Histones were  
644 subsequently concentrated by freeze drying and stored at -80°C.

### 645 **Middle-down proteomics for identification of combinatorial histone PTM**

646 Middle-down MS was performed according to Coradin *et al.* (2020) with a few  
647 modifications (Coradin *et al.*, 2020; Sidoli *et al.*, 2016b; Sweredoski *et al.*, 2017).  
648 Histones (15-50 µg) were suspended in 5 mM ammonium acetate to a final  
649 concentration of 0.5 µg/µL (pH 4.0). GluC endoprotease was diluted to 0.2 µg/µL in  
650 the same buffer and added to the histone samples a final concentration of 1:20 GluC

651 enzyme:histone. Histone samples were incubated for overnight at room temperature  
652 and digestion is blocked by addition of 1 % formic acid. Trifluoroacetic acid (0.1 %)  
653 was added to the digested peptides and desalted using StageTips packed with a  
654 solid phase C<sub>18</sub> column disk (3M Empore) with porous graphitic carbon (PGC)  
655 suspended in 100 % acetonitrile (ACN) on top and washed with 0.1 % trifluoroacetic  
656 acid. Peptides were eluted by the addition of 70 % acetonitrile and 0.1 %  
657 trifluoroacetic acid elution buffer. Histone protein samples were dried and suspended  
658 to a concentration of ~2 µg/µL in the sample buffer consisting of 60 % acetonitrile, 20  
659 mM propionic acid and ethylenediamine.

660 Separation of digested histone peptides was performed by using nanoliter flow liquid  
661 chromatography using an EASY-nLC nanoHPLC (Thermo Scientific, San Jose, CA,  
662 USA) equipped with an analytical weak cation exchange–hydrophilic interaction  
663 liquid chromatographic resin (PolycatA, PolyLC, Columbia, MD, USA) column (75 µm  
664 ID, 15 cm in length, 1.7 µm in diameter and a 1000 Å porosity). Buffer A was  
665 prepared with 70 % acetonitrile and 20 mM propionic acid to adjust the pH to 6.0.  
666 Buffer B consisted of 0.1% formic acid in LC-MS grade H<sub>2</sub>O. HPLC gradient was  
667 setup for a nonlinear gradient: 0-70 % of buffer B for 2 min followed with 72-85 %  
668 buffer B for more than 90 min. The gradient is on hold for 5 min at 95 % buffer B to  
669 wash the column prior to consequential sample loading. To minimize sample  
670 carryover, blanks were run frequently for at least 20 min with high (80-95 %) buffer  
671 B.

672 MS detection was performed using an Orbitrap Fusion mass spectrometer (Thermo  
673 Scientific, San Jose, CA, USA) operated in a data dependent mode and high mass  
674 resolution mode for both MS1 events and MS2 scans for each of the three stages  
675 investigated in two to three independent biological experiments. The full mass  
676 spectrum scan was set at 665–705 *m/z*, as this is the range of the most intense  
677 charge states (+8) for histone H3 polypeptides. A charge filter was added to include  
678 +8 charge states targeted for fragmentation. The ion transfer tube temperature was  
679 set to 300°C and the spray voltage to 2.3 kV. To fragment peptides while retaining  
680 PTM information, electron transfer dissociation (ETD) performed (Riley & Coon,  
681 2018; Riley *et al.*, 2017) at a resolution of 120 000 (MS1) and 30 000 (MS2). The  
682 ETD reaction time was 20 ms for polypeptides with +8 charge states. For high  
683 resolution spectrums, three microscans were averaged.

## 684 Middle-down proteomics data analysis

685 Raw MS files were deconvoluted with Xtract (Thermo) and searched using Mascot  
686 (v. 2.5) against histone sequences obtained from PlasmoDB resource  
687 (<https://plasmodb.org/>, version 43, released 25 April 2019). Files were searched with  
688 the following dynamic modifications: Acetylation (K), phosphorylation (ST), mono and  
689 dimethylation (RK), and trimethylation (K). The mass tolerance was set to 2.1 Da for  
690 precursor ions and 0.01 Da for fragment ions. IsoScale ([http://middle-](http://middle-down.github.io/Software/)  
691 [down.github.io/Software/](http://middle-down.github.io/Software/)) was used to confidently identify and quantify modified  
692 peptides. Only *c/z* fragment ions were allowed. PTMs were only accepted if there  
693 were at least one site determining ions on both sides of the assigned PTM.

694 Interplay scores between bivalent histone PTMs were calculated according to the  
695 following equation:

$$Interplay_{PTM1PTM2} = \log_2 \frac{F_{PTM1PTM2}}{F_{PTM1} \times F_{PTM2}}$$

696 Where  $F_{PTM1PTM2}$  is the observed relative abundance (F) of the combination divided  
697 by the predicted relative abundance of the combination, calculated by multiplication  
698 of the relative abundances of the individual histone PTMs. The relative abundance of  
699 the individual PTMs were calculated by summing the relative abundances of all  
700 combinatorial peptides contain the particular PTM. If the interplay score is positive, it  
701 is likely that the PTMs are co-dependent or positively related; a negative interplay  
702 score indicates that the PTMs are mutually exclusive. Ring plots were visualised  
703 using Cytoscape (v. 3.8.2). Other plots were created using GraphPad Prism 9 and R  
704 (R Studio v. 4.0.3).

## 705 Chromatin immunoprecipitation (ChIP)

706 A minimum number of isolated parasites ( $10^9$  cells/mL) was crosslinked with 1 %  
707 formaldehyde and subsequently quenched with 125 mM glycine. Crosslinked  
708 parasite nuclei were suspended in cold lysis buffer (10 mM HEPES pH 7.9, 10 mM  
709 KCl, 0.1 mM EDTA pH 8.0, 0.1 mM EGTA pH 8.0, 1 mM DTT and EDTA-free  
710 protease inhibitor cocktail) and transferred to a pre-chilled dounce homogeniser.  
711 NP40 was added to a final concentration of 0.25 % and parasites are subsequently  
712 lysed with dounce B for ~100 strokes. Sonication shearing buffer (cocktail of  
713 protease inhibitors, 1 % SDS, 50 mM Tris-HCl (pH 8.0), 10 mM EDTA and 100 mM

714 NaCl) were added to the nuclei pellet and sonicated with the BioRuptor UCD-200  
715 (Diagenode, Belgium) for 25 cycles at high power and 30 s intervals. Crosslinks were  
716 reversed by incubating the input sample overnight at 65°C. The input sample was  
717 suspended to a final volume of 200 µL with ChIP dilution buffer (0.01 % SDS, 1 %  
718 Triton X-100, 1.2 mM EDTA, 16.7 mM Tris-HCl, pH 8.0, 150 mM NaCl and a cocktail  
719 of protease inhibitors). To dilute the SDS in the dilution buffer, Tris-EDTA buffer (1 M  
720 Tris, pH 8.0 and 0.5M EDTA, pH 8.0) was added with RNase to a final concentration  
721 of 0.2 µg/µL and incubated for 1 h at 37°C. The chromatin soup was incubated with 1  
722 µg of either anti-H3K18ac or anti-H3K23ac, rotating at 4°C overnight. Protein G  
723 magnetic Dynabeads™ (Invitrogen by Thermo Fisher Scientific, Norway) was added  
724 and incubated for 2 h rotating at 4°C. A total 20 % of the eluted chromatin was then  
725 retained as the input. The remaining eluted material was then used for the western  
726 blot validation of combination histone PTM. the bead-chromatin complex was  
727 washed extensively with each of the following buffers with aspiration of the preceding  
728 buffer before addition of the next buffer: Low salt immune complex wash buffer (0.1  
729 % SDS, 1 % Triton X-100, 2 mM EDTA, 20 mM Tris-HCl pH 8.1, 150 mM NaCl), high  
730 salt immune complex wash buffer (0.1 % SDS, 1 % Triton X-100, 2 mM EDTA, 20  
731 mM Tris-HCl pH 8.1, 500 mM NaCl), LiCl immune complex wash buffer (0.25 M LiCl,  
732 1 % NP-40, 1 % deoxycolate, 1 mM EDTA, 10 mM Tris-HCl pH 8.1) and TE Buffer  
733 (10 mM Tris-HCl pH 8.0, 1 mM EDTA pH 8.0). The beads were suspended in fresh  
734 ChIP elution buffer (0.1 M NaHCO<sub>3</sub>, 1 % SDS) and the supernatant collected.

### 735 **Protein sample preparation for mass spectrometry analysis**

736 Briefly, protein samples were mixed with an equal volume of methanol:chloroform  
737 (3:1 ratio), followed by a brief vortex step and centrifugation at 4°C. Samples were  
738 washed twice with methanol followed by centrifugation at 17,000 xg for 3 min and  
739 complete removal of methanol:chloroform. The resulting precipitated proteins were  
740 dried at room temperature. All samples were dissolved in a solution containing 6 M  
741 urea, 2 M thiourea and 50 mM ammonium bicarbonate, pH 7-8. Samples were  
742 subjected to reduction, alkylation and digestion in preparation for MS as follows.  
743 Samples were incubated at room temperature for 1 h in 5 mM DTT to reduce  
744 disulphide bonds, cysteine residues alkylated in 50 mM iodoacetamide and  
745 subjected to Lys-C (1-1.5 µg) and trypsin (10 µg) digestion at room temperature for 3  
746 h. Samples were then diluted with 50 mM ammonium bicarbonate to lower the urea



747 and DTT concentrations in solution to prevent trypsin inactivation. The samples were  
748 sonicated (Sonic Dismembrator Model 100, Fischer Scientific, USA) for 3 cycles of  
749 10 s continuous sonication (output 2) followed by 10 s resting on ice to dissolve the  
750 pellets completely. Cysteine residues were alkylated by incubation with 40 mM  
751 iodoacetamide. This was followed by overnight digestion with 10 µg trypsin at room  
752 temperature. The pH of the trypsin digested samples was adjusted with ammonium  
753 hydroxide to ~pH 8-8.3 followed by centrifugation at 17,000 xg for 1 min. StageTip  
754 (STop And Go Extraction Tip) clean-up in combination with protein fractionation was  
755 performed for all the samples using a dual resin approach, where both Empore™  
756 C18 disks (3 M, USA) and Oligo™ R3 reversed-phase resins were used in  
757 combination. This was done to remove unwanted contaminants before MS and to  
758 fractionate the samples to ensure optimal protein detection. The column was  
759 equilibrated with 1 mM ammonium bicarbonate (pH 8.0), after which the supernatant  
760 of each sample was added to the dual resin StageTip and pushed through the  
761 column using a syringe (dropwise). All samples were dried down completely under  
762 vacuum (SpeedVac concentrator). In preparation for the MS run, 0.1 % formic acid  
763 was added to the samples followed by ultrasonic bath sonication for 10 min at 4°C.  
764 The samples were centrifuged at 17,000 xg for 10 min and the supernatant was  
765 loaded onto a Dionex™ -LC system (Thermo Fisher Scientific, USA), coupled online  
766 with a Q-Exactive HF mass spectrometer (Thermo Scientific, USA). Peptides were  
767 loaded into a picofrit 20 cm long fused silica capillary column (75 µm inner diameter)  
768 packed in-house with reversed-phase Repro-Sil Pur C18-AQ 3 µm resin. A gradient  
769 of 105 min was set for peptide elution from 2-28 % buffer B (100 % ACN/0.1 %  
770 formic acid), followed by a gradient from 28-80 % buffer B in 5 min and an isocratic  
771 80 % B for 10 min. The flow rate was set at 300 nL/min. MS method was set up in a  
772 DDA mode. The full MS scan was performed at 70,000 resolutions [full width at half  
773 maximum (FWHM) at 200 m/z] in the m/z range 350-1200 and an AGC target of 106.  
774 Tandem MS (MS/MS) was performed at a resolution of 17,500 with a Higher Energy  
775 Collision Dissociation (HCD) collision energy set to 20, an AGC target of 5x10<sup>4</sup>, a  
776 maximum injection time to 100 ms, a loop count of 12, an intensity threshold for  
777 signal selection at 104, including charge states 2-4, and a dynamic exclusion set to  
778 45 s.

## 779 **Chromatin proteomic profiling data analysis**

780 MS raw files were analysed by MaxQuant software version 1.5.2.8. MS/MS spectra  
781 were searched by the Andromeda search engine against the *P. falciparum* UniProt  
782 FASTA database. Mass accuracy was set at 4.5 ppm for precursor and 20 ppm for  
783 the product mass tolerance. Peptides were filtered for high confidence (FDR<1 %)   
784 using Fixed Value validator. Intensity-based absolute quantification (iBAQ) enabled  
785 for label-free quantification, where iBAQ values are calculated by a MaxQuant  
786 algorithm (sum of peak intensities of all peptides matching to a specific  
787 protein/number of theoretical peptides). Match between runs was enabled and set to  
788 a 1 min window. All samples were run in triplicate for three independent biological  
789 replicates. For data analysis, iBAQ values were log<sub>2</sub>-transformed and normalised by  
790 subtracting to each value the average value of the respective sample. The peptide  
791 relative ratio was calculated using the total area under the extracted ion  
792 chromatograms of all peptides with the same amino acid sequence (including all its  
793 modified forms) as 100 %. For isobaric peptides, the relative ratio of two isobaric  
794 forms was estimated by averaging the ratio for each fragment ion with different mass  
795 between the two species. Next, extracted ion chromatography of those m/z ions with  
796 a mass tolerance of 10 ppm were performed. Statistical significance was assessed  
797 using a two-tails heteroscedastic t-test (*P*-value representation \* = <0.05,  
798 \*\* = <0.005, \*\*\* = <0.0005).

### 799 **Protein-protein interaction model**

800 STRING v.10 database [string.org, (Szklarczyk *et al.*, 2015)] parameters were set to  
801 include protein-protein interactions based on evidence, sourced from neighbourhood,  
802 experiments, databases, co-occurrence and co-expression. The minimum required  
803 interaction score was required to be of high confidence (0.7) with a maximum of 100  
804 proteins interacting the first shell and 100 proteins in the second shell. Data from  
805 peptide pulldowns studies were pooled from Singh *et al.*, 2020 and Hoeijmakers *et*  
806 *al.*, 2019 and filtered only to include proteins that were significantly enriched in the  
807 respective studies. Finally, protein-protein interactions derived from yeast-two-hybrid  
808 study (La Count *et al.*, 2005). Taken together, proteins were imported into Cytoscape  
809 (version 3.8.2). Proteins were further filtered to include only known chromatin  
810 associated proteins and proteins that have homology to known H3K18ac and  
811 H3K23ac associated proteins.

812

### 813 **Acknowledgements**

814 This work was supported by the South African Research Chairs Initiative of the  
815 Department of Science and Innovation, administered through the South African  
816 National Research Foundation (UID 84627) to LMB. The UP ISMC acknowledges  
817 the South African Medical Research Council (SA MRC) as Collaborating Centre for  
818 Malaria Research. SS gratefully acknowledges the Leukemia Research Foundation  
819 (Hollis Brownstein New Investigator Research Grant), AFAR (Sagol Network  
820 GerOmics award), Deerfield (Xseed award) and the NIH Office of the Director  
821 (1S10OD030286-01). Funding from the National Institutes of Health (grants  
822 AI118891 and CA196539) to BAG are gratefully acknowledged.

### 823 **Author Contributions**

824 LMB conceived the study. HvG, MC, MM and JR conducted experiments, and  
825 analysed data with SS for interpretation. HvG and LMB wrote the paper with inputs  
826 from the other authors. All co-authors approved the final version of the paper.

### 827 **Conflict of Interest**

828 The authors declare that they have no conflict of interest.

### 829 **Data Availability**

830 The middle-down proteomics data generated in this study have been deposited  
831 in the Chorus database (<https://chorusproject.org>) and are accessible through project  
832 number 1721. All raw files from the ChIP-MS data are freely available on  
833 <https://chorusproject.org> at the project no. 1730. The data analysis pipeline meets all  
834 MIAPE standards.

## 835 References

836

837 Atlasi Y., Stunnenberg H. G. (2017) The interplay of epigenetic marks during stem  
838 cell differentiation and development. *Nat Rev Genet* 18: 643-658

839 Bae S., Lesch B. J. (2020) H3K4me1 distribution predicts transcription state and  
840 poising at promoters. *Front Cell Dev Biol* 8: 289

841 Barber M. F., Michishita-Kioi E., Xi Y., Tasselli L., Kioi M., Moqtaderi Z., Tennen R.  
842 I., Paredes S., Young N. L., Chen K. *et al.* (2012) SIRT7 links H3K18 deacetylation  
843 to maintenance of oncogenic transformation. *Nature* 487: 114-118

844 Barisic D., Stadler M. B., Iurlaro M., Schubeler D. (2019) Mammalian ISWI and  
845 SWI/SNF selectively mediate binding of distinct transcription factors. *Nature* 569:  
846 136-140

847 Bartfai R., Hoeijmakers W. A., Salcedo-Amaya A. M., Smits A. H., Janssen-Megens  
848 E., Kaan A., Treeck M., Gilberger T. W., Francoijs K. J., Stunnenberg H. G. (2010)  
849 H2A.Z demarcates intergenic regions of the *Plasmodium falciparum* epigenome that  
850 are dynamically marked by H3K9ac and H3K4me3. *PLoS Pathog* 6: e1001223

851 Batugedara G., Lu X. M., Saraf A., Sardu M. E., Cort A., Abel S., Prudhomme J.,  
852 Washburn M. P., Florens L., Bunnik E. M. *et al.* (2020) The chromatin bound  
853 proteome of the human malaria parasite. *Microb Genom* 6

854 Becker J. S., Nicetto D., Zaret K. S. (2016) H3K9me3-dependent heterochromatin:  
855 barrier to cell fate changes. *Trends Genet* 32: 29-41

856 Benevento M., Tonge P. D., Puri M. C., Nagy A., Heck A. J., Munoz J. (2015)  
857 Fluctuations in histone H4 isoforms during cellular reprogramming monitored by  
858 middle-down proteomics. *Proteomics* 15: 3219-3231

859 Berger S. (2002) Histone modifications in transcriptional regulation. *Curr Opin Genet*  
860 *Dev* 12: 142-148

861 Bhanu N. V., Sidoli S., Garcia B. A. (2016) Histone modification profiling reveals  
862 differential signatures associated with human embryonic stem cell self-renewal and  
863 differentiation. *Proteomics* 16: 448-458

864 Bozdech Z., Llinas M., Pulliam B. L., Wong E. D., Zhu J., DeRisi J. L. (2003) The  
865 transcriptome of the intraerythrocytic developmental cycle of *Plasmodium falciparum*.  
866 *PLoS Biol* 1: 85-100

867 Brancucci N. M. B., Bertschi N. L., Zhu L., Niederwieser I., Chin W. H., Wampfler R.,  
868 Freymond C., Rottmann M., Felger I., Bozdech Z. *et al.* (2014) Heterochromatin  
869 protein 1 secures survival and transmission of malaria parasites. *Cell Host Microbe*  
870 16: 165-176

- 871 Chen J., Liu H., Liu J., Qi J., Wei B., Yang J., Liang H., Chen Y., Chen J., Wu Y. *et*  
872 *al.* (2013) H3K9 methylation is a barrier during somatic cell reprogramming into  
873 iPSCs. *Nat Genet* 45: 34-42
- 874 Chen P. B., Ding S., Zanghi G., Soulard V., DiMaggio P. A., Fuchter M. J., Mecheri  
875 S., Mazier D., Scherf A., Malmquist N. A. (2016) *Plasmodium falciparum* PfSET7:  
876 enzymatic characterization and cellular localization of a novel protein  
877 methyltransferase in sporozoite, liver and erythrocytic stage parasites. *Sci Rep* 6:  
878 21802
- 879 Chen T., Dent S. Y. (2014) Chromatin modifiers and remodellers: regulators of  
880 cellular differentiation. *Nat Rev Genet* 15: 93-106
- 881 Coetzee N., Sidoli S., van Biljon R., Painter H., Llinas M., Garcia B. A., Birkholtz L.  
882 M. (2017) Quantitative chromatin proteomics reveals a dynamic histone post-  
883 translational modification landscape that defines asexual and sexual *Plasmodium*  
884 *falciparum* parasites. *Sci Rep* 7: 607
- 885 Coetzee N., von Grüning H., Opperman D., van der Watt M., Reader J., Birkholtz L.  
886 M. (2020) Epigenetic inhibitors target multiple stages of *Plasmodium falciparum*  
887 parasites. *Sci Rep* 10: 2355
- 888 Connacher J., Josling G. A., Orchard L. M., Reader J., Llinas M., Birkholtz L. M.  
889 (2021) H3K36 methylation reprograms gene expression to drive early gametocyte  
890 development in *Plasmodium falciparum*. *Epigenetics Chromatin* 14: 19
- 891 Coradin M., Mendoza M. R., Sidoli S., Alpert A. J., Lu C., Garcia B. A. (2020) Bullet  
892 points to evaluate the performance of the middle-down proteomics workflow for  
893 histone modification analysis. *Methods* 184: 86-92
- 894 Cui L., Miao J. (2010) Chromatin-mediated epigenetic regulation in the malaria  
895 parasite *Plasmodium falciparum*. *Eukaryot Cell* 9: 1138-1149
- 896 Daujat S., Bauer U., Shah V., Turner B., Berger S., Kouzarides T. (2002) Crosstalk  
897 between CARM1 methylation and CBP acetylation on Histone H3. *Current Biology*  
898 12
- 899 Di Lorenzo A., Bedford M. T. (2011) Histone arginine methylation. *FEBS Lett* 585:  
900 2024-2031
- 901 Dong F., Li Q., Yang C., Huo D., Wang X., Ai C., Kong Y., Sun X., Wang W., Zhou Y.  
902 *et al.* (2018) PRMT2 links histone H3R8 asymmetric dimethylation to oncogenic  
903 activation and tumorigenesis of glioblastoma. *Nat Commun* 9: 4552
- 904 Drew A. E., Moradei O., Jacques S. L., Rioux N., Boriack-Sjodin A. P., Allain C.,  
905 Scott M. P., Jin L., Raimondi A., Handler J. L. *et al.* (2017) Identification of a CARM1  
906 inhibitor with potent *in vitro* and *in vivo* activity in preclinical models of multiple  
907 myeloma. *Sci Rep* 7: 17993
- 908 Dutta A., Sardi M., Gogol M., Gilmore J., Zhang D., Florens L., Abmayr S. M.,  
909 Washburn M. P., Workman J. L. (2017) Composition and function of mutant Swi/Snf  
910 complexes. *Cell Rep* 18: 2124-2134

- 911 Fan Q., An L., Cui L. (2004a) PfADA2, a *Plasmodium falciparum* homologue of the  
912 transcriptional coactivator ADA2 and its *in vivo* association with the histone  
913 acetyltransferase PfGCN5. *Gene* 336: 251-261
- 914 Fan Q., An L., Cui L. (2004b) *Plasmodium falciparum* histone acetyltransferase, a  
915 yeast GCN5 homologue involved in chromatin remodeling. *Eukaryot Cell* 3: 264-276
- 916 Fan Q., Miao J., Cui L., Cui L. (2009) Characterization of PRMT1 from *Plasmodium*  
917 *falciparum*. *Biochem J* 421: 107-118
- 918 Ferrari K. J., Scelfo A., Jammula S., Cuomo A., Barozzi I., Stutzer A., Fischle W.,  
919 Bonaldi T., Pasini D. (2014) Polycomb-dependent H3K27me1 and H3K27me2  
920 regulate active transcription and enhancer fidelity. *Mol Cell* 53: 49-62
- 921 Fischle W., Tseng B. S., Dormann H. L., Ueberheide B. M., Garcia B. A.,  
922 Shabanowitz J., Hunt D. F., Funabiki H., Allis C. D. (2005) Regulation of HP1-  
923 chromatin binding by histone H3 methylation and phosphorylation. *Nature* 438: 1116-  
924 1122
- 925 Flueck C., Bartfai R., Volz J., Niederwieser I., Salcedo-Amaya A. M., Alako B. T.,  
926 Ehlgen F., Ralph S. A., Cowman A. F., Bozdech Z. *et al.* (2009) *Plasmodium*  
927 *falciparum* heterochromatin protein 1 marks genomic loci linked to phenotypic  
928 variation of exported virulence factors. *PLoS Pathog* 5: e1000569
- 929 Fulton M. D., Brown T., Zheng Y. G. (2018) Mechanisms and Inhibitors of Histone  
930 Arginine Methylation. *Chem Rec* 18: 1792-1807
- 931 Garabedian A., Baird M. A., Porter J., Jeanne Dit Fouque K., Shliaha P. V., Jensen  
932 O. N., Williams T. D., Fernandez-Lima F., Shvartsburg A. A. (2018) Linear and  
933 differential ion mobility separations of middle-down proteoforms. *Anal Chem* 90:  
934 2918-2925
- 935 Garcia B. A., Pesavento J. J., Mizzen C. A., Kelleher N. L. (2007) Pervasive  
936 combinatorial modification of histone H3 in human cells. *Nat Methods* 4: 487-489
- 937 Gonzales-Cope M., Sidoli S., Bhanu N. V., Won K. J., Garcia B. A. (2016) Histone  
938 H4 acetylation and the epigenetic reader Brd4 are critical regulators of pluripotency  
939 in embryonic stem cells. *BMC Genomics* 17: 95
- 940 Govin J., Dorsey J., Gaucher J., Rousseaux S., Khochbin S., Berger S. L. (2010)  
941 Systematic screen reveals new functional dynamics of histones H3 and H4 during  
942 gametogenesis. *Genes Dev* 24: 1772-1786
- 943 Greer S. M., Sidoli S., Coradin M., Schack Jespersen M., Schwammle V., Jensen O.  
944 N., Garcia B. A., Brodbelt J. S. (2018) Extensive characterization of heavily modified  
945 histone tails by 193 nm ultraviolet photodissociation mass spectrometry via a middle-  
946 down strategy. *Anal Chem* 90: 10425-10433
- 947 Grewal S. I., Rice J. C. (2004) Regulation of heterochromatin by histone methylation  
948 and small RNAs. *Curr Opin Cell Biol* 16: 230-238

- 949 Gupta A. P., Zhu L., Tripathi J., Kucharski M., Patra A., Bozdech Z. (2017) Histone 4  
950 lysine 8 acetylation regulates proliferation and host-pathogen interaction in  
951 *Plasmodium falciparum*. *Epigenetics Chromatin* 10: 40
- 952 Halasa M., Wawruszak A., Przybyszewska A., Jaruga A., Guz M., Kalafut J.,  
953 Stepulak A., Cybulski M. (2019) H3K18Ac as a Marker of Cancer Progression and  
954 Potential Target of Anti-Cancer Therapy. *Cells* 8
- 955 Hirota T., Lipp J. J., Toh B. H., Peters J. M. (2005) Histone H3 serine 10  
956 phosphorylation by Aurora B causes HP1 dissociation from heterochromatin. *Nature*  
957 438: 1176-1180
- 958 Hoeijmakers W. A. M., Miao J., Schmidt S., Toenhake C. G., Shrestha S., Venhuizen  
959 J., Henderson R., Birnbaum J., Ghidelli-Disse S., Drewes G. *et al.* (2019) Epigenetic  
960 reader complexes of the human malaria parasite, *Plasmodium falciparum*. *Nucleic*  
961 *Acids Res* 47: 11574-11588
- 962 Hollin T., Le Roch K. G. (2020) From genes to transcripts, a tightly regulated journey  
963 in *Plasmodium*. *Front Cell Infect Microbiol* 10: 618454
- 964 Holt M. V., Wang T., Young N. L. (2019) One-pot quantitative top- and middle-down  
965 analysis of GluC-digested histone H4. *J Am Soc Mass Spectrom* 30: 2514-2525
- 966 Huang M., Hull C. M. (2017) Sporulation: how to survive on planet earth (and  
967 beyond). *Curr Genet* 63: 831-838
- 968 Hunter T. (2007) The age of crosstalk: phosphorylation, ubiquitination, and beyond.  
969 *Mol Cell* 28: 730-738
- 970 Hwang J. W., Cho Y., Bae G. U., Kim S. N., Kim Y. K. (2021) Protein arginine  
971 methyltransferases: promising targets for cancer therapy. *Exp Mol Med* 53: 788-808
- 972 Janssen K. A., Coradin M., Lu C., Sidoli S., Garcia B. A. (2019) Quantitation of single  
973 and combinatorial histone modifications by integrated chromatography of bottom-up  
974 peptides and middle-down polypeptide tails. *J Am Soc Mass Spectrom* 30: 2449-  
975 2459
- 976 Jenuwein T., Allis C. D. (2001) Translating the histone code. *Epigenetics* 293: 1074-  
977 1080
- 978 Jiang L., Mu J., Zhang Q., Ni T., Srinivasan P., Rayavara K., Yang W., Turner L.,  
979 Lavstsen T., Theander T. G. *et al.* (2013) PfSETvs methylation of histone H3K36  
980 represses virulence genes in *Plasmodium falciparum*. *Nature* 499: 223-227
- 981 Jiang T., Hoover M. E., Holt M. V., Freitas M. A., Marshall A. G., Young N. L. (2018)  
982 Middle-down characterization of the cell cycle dependence of histone H4 post-  
983 translational modifications and proteoforms. *Proteomics* 18: e1700442
- 984 Johansen K. M., Johansen J. (2006) Regulation of chromatin structure by histone  
985 H3S10 phosphorylation. *Chromosome Res* 14: 393-404

- 986 Josling G. A., Williamson K. C., Llinas M. (2018) Regulation of sexual commitment  
987 and gametocytogenesis in malaria parasites. *Annu Rev Microbiol* 72: 501-519
- 988 Jung H. R., Sidoli S., Haldbo S., Sprenger R. R., Schwammle V., Pasini D., Helin K.,  
989 Jensen O. N. (2013) Precision mapping of coexisting modifications in histone H3  
990 tails from embryonic stem cells by ETD-MS/MS. *Anal Chem* 85: 8232-8239
- 991 Karachentsev D., Druzhinina M., Steward R. (2007) Free and chromatin-associated  
992 mono-, di-, and trimethylation of histone H4-lysine 20 during development and cell  
993 cycle progression. *Developmental Biology* 304: 46-52
- 994 Karmodiya K., Pradhan S. J., Joshi B., Jangid R., Reddy P. C., Galande S. (2015) A  
995 comprehensive epigenome map of *Plasmodium falciparum* reveals unique  
996 mechanisms of transcriptional regulation and identifies H3K36me2 as a global mark  
997 of gene suppression. *Epigenetics Chromatin* 8: 32
- 998 Kirmizis A., Santos-Rosa H., Penkett C. J., Singer M. A., Vermeulen M., Mann M.,  
999 Bahler J., Green R. D., Kouzarides T. (2007) Arginine methylation at histone H3R2  
1000 controls deposition of H3K4 trimethylation. *Nature* 449: 928-932
- 1001 Kirsch R., Jensen O. N., Schwammle V. (2020) Visualization of the dynamics of  
1002 histone modifications and their crosstalk using PTM-CrossTalkMapper. *Methods*
- 1003 Klein B. J., Jang S. M., Lachance C., Mi W., Lyu J., Sakuraba S., Krajewski K.,  
1004 Wang W. W., Sidoli S., Liu J. *et al.* (2019) Histone H3K23-specific acetylation by  
1005 MORF is coupled to H3K14 acylation. *Nat Commun* 10: 4724
- 1006 LaCount D. J., Vignali M., Chettier R., Phansalkar A., Bell R., Hesselberth J. R.,  
1007 Schoenfeld L. W., Ota I., Sahasrabudhe S., Kurschner C. *et al.* (2005) A protein  
1008 interaction network of the malaria parasite *Plasmodium falciparum*. *Nature* 438: 103-  
1009 107
- 1010 Lasonder E., Rijpma S. R., van Schaijk B. C., Hoeijmakers W. A., Kensche P. R.,  
1011 Gresnigt M. S., Italiaander A., Vos M. W., Woestenenk R., Bousema T. *et al.* (2016)  
1012 Integrated transcriptomic and proteomic analyses of *P. falciparum* gametocytes:  
1013 molecular insight into sex-specific processes and translational repression. *Nucleic  
1014 Acids Res* 44: 6087-6101
- 1015 Li Q. Q., Hao J. J., Zhang Z., Krane L. S., Hammerich K. H., Sanford T., Trepel J. B.,  
1016 Neckers L., Agarwal P. K. (2017) Proteomic analysis of proteome and histone post-  
1017 translational modifications in heat shock protein 90 inhibition-mediated bladder  
1018 cancer therapeutics. *Sci Rep* 7: 201
- 1019 Li Y., Seto E. (2016) HDACs and HDAC inhibitors in cancer development and  
1020 therapy. *Cold Spring Harb Perspect Med* 6
- 1021 Liao X., Liao Y., Zou Y., Li G., Liao C. (2015) Epigenetic modifications of histone H3  
1022 during the transdifferentiation of Thy-1(+) Lin(-) bone marrow cells into hepatocytes.  
1023 *Mol Med Rep* 12: 7561-7567



- 1024 Liu L., Cheung T. H., Charville G. W., Hurgó B. M., Leavitt T., Shih J., Brunet A.,  
1025 Rando T. A. (2013) Chromatin modifications as determinants of muscle stem cell  
1026 quiescence and chronological aging. *Cell Rep* 4: 189-204
- 1027 Lopez-Barragan M. J., Lemieux J., Quinones M., Williamson K. C., Molina-Cruz A.,  
1028 Cui K., Barillas-Mury C., Zhao K., Su X. Z. (2011) Directional gene expression and  
1029 antisense transcripts in sexual and asexual stages of *Plasmodium falciparum*. *BMC*  
1030 *Genomics* 12: 587
- 1031 Luo M., Bai J., Liu B., Yan P., Zuo F., Sun H., Sun Y., Xu X., Song Z., Yang Y. *et al.*  
1032 (2019) H3K18ac primes mesendodermal differentiation upon nodal signaling. *Stem*  
1033 *Cell Reports* 13: 642-656
- 1034 Lv D., Li Y., Zhang W., Alvarez A. A., Song L., Tang J., Gao W. Q., Hu B., Cheng S.  
1035 Y., Feng H. (2017) TRIM24 is an oncogenic transcriptional co-activator of STAT3 in  
1036 glioblastoma. *Nat Commun* 8: 1454
- 1037 Ma L., Yuan L., An J., Barton M. C., Zhang Q., Liu Z. (2016) Histone H3 lysine 23  
1038 acetylation is associated with oncogene TRIM24 expression and a poor prognosis in  
1039 breast cancer. *Tumour Biol* 37: 14803-14812
- 1040 Maier A. G., Matuschewski K., Zhang M., Rug M. (2019) *Plasmodium falciparum*.  
1041 *Trends Parasitol* 35: 481-482
- 1042 Miao J., Fan Q., Cui L., Li X., Wang H., Ning G., Reese J. C., Cui L. (2010) The  
1043 MYST family histone acetyltransferase regulates gene expression and cell cycle in  
1044 malaria parasite *Plasmodium falciparum*. *Mol Microbiol* 78: 883-902
- 1045 Miller J. L., Grant P. A. (2013) The role of DNA methylation and histone  
1046 modifications in transcriptional regulation in humans. *Subcell Biochem* 61: 289-317
- 1047 Mohrmann L., Langenberg K., Krijgsveld J., Kal A. J., Heck A. J., Verrijzer C. P.  
1048 (2004) Differential targeting of two distinct SWI/SNF-related *Drosophila* chromatin-  
1049 remodeling complexes. *Mol Cell Biol* 24: 3077-3088
- 1050 Moradian A., Kalli A., Sweredoski M. J., Hess S. (2014) The top-down, middle-down,  
1051 and bottom-up mass spectrometry approaches for characterization of histone  
1052 variants and their post-translational modifications. *Proteomics* 14: 489-497
- 1053 Nicetto D., Zaret K. S. (2019) Role of H3K9me3 heterochromatin in cell identity  
1054 establishment and maintenance. *Curr Opin Genet Dev* 55: 1-10
- 1055 Oehring S. C., Woodcroft B. J., Moes S., Wetzel J., Dietz O., Pulfer A., Dekiwadia  
1056 C., Maeser P., Flueck C., Witmer K. *et al.* (2012) Organellar proteomics reveals  
1057 hundreds of novel nuclear proteins in the malaria parasite *Plasmodium falciparum*.  
1058 *Genome Biology* 13
- 1059 Painter H. J., Carrasquilla M., Llinas M. (2017) Capturing in vivo RNA transcriptional  
1060 dynamics from the malaria parasite *Plasmodium falciparum*. *Genome Res* 27: 1074-  
1061 1086

- 1062 Perez-Toledo K., Rojas-Meza A. P., Mancio-Silva L., Hernandez-Cuevas N. A.,  
1063 Delgadillo D. M., Vargas M., Martinez-Calvillo S., Scherf A., Hernandez-Rivas R.  
1064 (2009) *Plasmodium falciparum* heterochromatin protein 1 binds to tri-methylated  
1065 histone 3 lysine 9 and is linked to mutually exclusive expression of *var* genes.  
1066 *Nucleic Acids Res* 37: 2596-2606
- 1067 Pesavento J. J., Mizzen C. A., Kelleher N. L. (2006) Quantitative Analysis of  
1068 Modified Proteins and Their Positional Isomers by Tandem Mass Spectrometry:  
1069 Human Histone H4. *Anal Chem* 78: 4271-4280
- 1070 Rando O. J. (2007) Global patterns of histone modifications. *Curr Opin Genet Dev*  
1071 17: 94-99
- 1072 Reader J., Botha M., Theron A., Lauterbach S. B., Rossouw C., Engelbrecht D.,  
1073 Wepener M., Smit A., Leroy D., Mancama D. *et al.* (2015) Nowhere to hide:  
1074 interrogating different metabolic parameters of *Plasmodium falciparum* gametocytes  
1075 in a transmission blocking drug discovery pipeline towards malaria elimination. *Malar*  
1076 *J* 14: 213
- 1077 Riley N. M., Coon J. J. (2018) The Role of Electron Transfer Dissociation in Modern  
1078 Proteomics. *Anal Chem* 90: 40-64
- 1079 Riley N. M., Westphall M. S., Coon J. J. (2017) Activated Ion-Electron Transfer  
1080 Dissociation Enables Comprehensive Top-Down Protein Fragmentation. *J Proteome*  
1081 *Res* 16: 2653-2659
- 1082 Sakabe K., Hart G. W. (2010) O-GlcNAc transferase regulates mitotic chromatin  
1083 dynamics. *J Biol Chem* 285: 34460-34468
- 1084 Salcedo-Amaya A. M., van Driel M. A., Alako B. T., Trelle B. M., van den Elzen A. M.  
1085 G., Cohen A. M., Janssen-Megens E. M., van de Vegte-Bolmer M. G., Selzer R. R.,  
1086 Iniguez A. L. *et al.* (2009) Dynamic histone H3 epigenome marking during the  
1087 intraerythrocytic cycle of *Plasmodium falciparum*. *PNAS* 106: 9655–9660
- 1088 Santos J. M., Josling G., Ross P., Joshi P., Orchard L., Campbell T., Schieler A.,  
1089 Cristea I. M., Llinas M. (2017) Red Blood Cell Invasion by the Malaria Parasite Is  
1090 Coordinated by the PfAP2-I Transcription Factor. *Cell Host Microbe* 21: 731-741  
1091 e710
- 1092 Sanz A. B., Garcia R., Rodriguez-Pena J. M., Nombela C., Arroyo J. (2016)  
1093 Cooperation between SAGA and SWI/SNF complexes is required for efficient  
1094 transcriptional responses regulated by the yeast MAPK Slt2. *Nucleic Acids Res* 44:  
1095 7159-7172
- 1096 Saraf A., Cervantes S., Bunnik E. M., Ponts N., Sardu M. E., Chung D. W.,  
1097 Prudhomme J., Varberg J. M., Wen Z., Washburn M. P. *et al.* (2016) Dynamic and  
1098 combinatorial landscape of histone modifications during the intraerythrocytic  
1099 developmental cycle of the malaria parasite. *J Proteome Res* 15: 2787-2801
- 1100 Schneider R., Bannister A. J., Myers F. A., Thorne A. W., Crane-Robinson C.,  
1101 Kouzarides T. (2004) Histone H3 lysine 4 methylation patterns in higher eukaryotic  
1102 genes. *Nat Cell Biol* 6: 73-77

- 1103 Schröder C. U., Ziemianowicz D. S., Merx K., Schriemer D. C. (2018) Simultaneous  
1104 proteoform analysis of histones H3 and H4 with a simplified middle-down proteomics  
1105 method. *Anal Chem* 90: 3083-3090
- 1106 Schwammle V., Aspalter C. M., Sidoli S., Jensen O. N. (2014) Large scale analysis  
1107 of co-existing post-translational modifications in histone tails reveals global fine  
1108 structure of cross-talk. *Mol Cell Proteomics* 13: 1855-1865
- 1109 Schwammle V., Sidoli S., Ruminowicz C., Wu X., Lee C. F., Helin K., Jensen O. N.  
1110 (2016) Systems level analysis of histone H3 post-translational modifications (PTMs)  
1111 reveals features of PTM crosstalk in chromatin regulation. *Mol Cell Proteomics* 15:  
1112 2715-2729
- 1113 Shishkova E., Zeng H., Liu F., Kwiecien N. W., Hebert A. S., Coon J. J., Xu W.  
1114 (2017) Global mapping of CARM1 substrates defines enzyme specificity and  
1115 substrate recognition. *Nat Commun* 8: 15571
- 1116 Shock J. L., Fischer K. F., DeRisi J. L. (2007) Whole-genome analysis of mRNA  
1117 decay in *Plasmodium falciparum* reveals a global lengthening of mRNA half-life  
1118 during the intra-erythrocytic development cycle. *Genome Biol* 8: R134
- 1119 Sidoli S., Bhanu N. V., Karch K. R., Wang X., Garcia B. A. (2016a) Complete  
1120 workflow for analysis of histone post-translational modifications using bottom-up  
1121 mass spectrometry: from histone extraction to data analysis. *J Vis Exp*
- 1122 Sidoli S., Garcia B. A. (2017) Middle-down proteomics: a still unexploited resource  
1123 for chromatin biology. *Expert Rev Proteomics* 14: 617-626
- 1124 Sidoli S., Lu C., Coradin M., Wang X., Karch K. R., Ruminowicz C., Garcia B. A.  
1125 (2017) Metabolic labeling in middle-down proteomics allows for investigation of the  
1126 dynamics of the histone code. *Epigenetics Chromatin* 10: 34
- 1127 Sidoli S., Schwammle V., Ruminowicz C., Hansen T. A., Wu X., Helin K., Jensen O.  
1128 N. (2014) Middle-down hybrid chromatography/tandem mass spectrometry workflow  
1129 for characterization of combinatorial post-translational modifications in histones.  
1130 *Proteomics* 14: 2200-2211
- 1131 Sidoli S., Vandamme J., Salcini A. E., Jensen O. N. (2016b) Dynamic changes of  
1132 histone H3 marks during *Caenorhabditis elegans* lifecycle revealed by middle-down  
1133 proteomics. *Proteomics* 16: 459-464
- 1134 Singh S., Santos J. M., Orchard L. M., Yamada N., van Biljon R., Painter H. J.,  
1135 Mahony S., Llinás M. (2020) The PfAP2-G2 transcription factor is a critical regulator  
1136 of gametocyte maturation. *Molecular Microbiology*
- 1137 Strahl B. D., Allis C. D. (2000) The language of covalent histone modifications.  
1138 *Nature* 403: 41-45
- 1139 Sweredoski M. J., Moradian A., Hess S. (2017) High-resolution parallel reaction  
1140 monitoring with electron transfer dissociation for middle-down proteomics: an  
1141 application to study the quantitative changes induced by histone modifying enzyme  
1142 inhibitors and activators. *Methods Mol Biol* 1647: 61-69

- 1143 Szklarczyk D., Franceschini A., Wyder S., Forslund K., Heller D., Huerta-Cepas J.,  
1144 Simonovic M., Roth A., Santos A., Tsafou K. P. *et al.* (2015) STRING v10: protein-  
1145 protein interaction networks, integrated over the tree of life. *Nucleic Acids Res* 43:  
1146 D447-452
- 1147 Tang J., Chisholm S. A., Yeoh L. M., Gilson P. R., Papenfuss A. T., Day K. P., Petter  
1148 M., Duffy M. F. (2020) Histone modifications associated with gene expression and  
1149 genome accessibility are dynamically enriched at *Plasmodium falciparum* regulatory  
1150 sequences. *Epigenetics Chromatin* 13: 50
- 1151 Tsai W. W., Wang Z., Yiu T. T., Akdemir K. C., Xia W., Winter S., Tsai C. Y., Shi X.,  
1152 Schwarzer D., Plunkett W. *et al.* (2010) TRIM24 links a non-canonical histone  
1153 signature to breast cancer. *Nature* 468: 927-932
- 1154 Turner B. M. (2000) Histone acetylation and an epigenetic code. *Bioessays* 22: 836-  
1155 845
- 1156 Tvardovskiy A., Schwammle V., Kempf S. J., Rogowska-Wrzesinska A., Jensen O.  
1157 N. (2017) Accumulation of histone variant H3.3 with age is associated with profound  
1158 changes in the histone methylation landscape. *Nucleic Acids Res* 45: 9272-9289
- 1159 Tvardovskiy A., Wrzesinski K., Sidoli S., Fey S. J., Rogowska-Wrzesinska A.,  
1160 Jensen O. N. (2015) Top-down and middle-down protein analysis reveals that intact  
1161 and clipped human histones differ in post-translational modification patterns. *Mol Cell*  
1162 *Proteomics* 14: 3142-3153
- 1163 Tweedie-Cullen R. Y., Brunner A. M., Grossmann J., Mohanna S., Sichau D., Nanni  
1164 P., Panse C., Mansuy I. M. (2012) Identification of combinatorial patterns of post-  
1165 translational modifications on individual histones in the mouse brain. *PLoS One* 7:  
1166 e36980
- 1167 van Biljon R., van Wyk R., Painter H. J., Orchard L., Reader J., Niemand J., Llinas  
1168 M., Birkholtz L. M. (2019) Hierarchical transcriptional control regulates *Plasmodium*  
1169 *falciparum* sexual differentiation. *BMC Genomics* 20: 920
- 1170 Vanagas L., Marisol Contreras S., Oscar Angel S. (2020) Apicomplexa and histone  
1171 variants: what's new? In: *Chromatin and Epigenetics*,
- 1172 Vandamme J., Sidoli S., Mariani L., Friis C., Christensen J., Helin K., Jensen O. N.,  
1173 Salcini A. E. (2015) H3K23me2 is a new heterochromatic mark in *Caenorhabditis*  
1174 *elegans*. *Nucleic Acids Res* 43: 9694-9710
- 1175 Vastenhouw N. L., Schier A. F. (2012) Bivalent histone modifications in early  
1176 embryogenesis. *Curr Opin Cell Biol* 24: 374-386
- 1177 Wang L., Joshi P., Miller E. L., Higgins L., Slattery M., Simon J. A. (2018) A role for  
1178 monomethylation of histone H3-K27 in gene activity in *Drosophila*. *Genetics* 208:  
1179 1023-1036
- 1180 Wierer M., Mann M. (2016) Proteomics to study DNA-bound and chromatin-  
1181 associated gene regulatory complexes. *Hum Mol Genet* 25: R106-R114

- 1182 Wu J., Xu W. (2012) Histone H3R17me2a mark recruits human RNA polymerase-  
1183 associated factor 1 complex to activate transcription. *Proc Natl Acad Sci U S A* 109:  
1184 5675-5680
- 1185 Xu Y., Qiao D., Wen Y., Bi Y., Chen Y., Huang Z., Cui L., Guo J., Cao Y. (2020)  
1186 PfAP2-G2 is associated to production and maturation of gametocytes in *Plasmodium*  
1187 *falciparum* via regulating the expression of PfMDV-1. *Front Microbiol* 11: 631444
- 1188 Young C. P., Hillyer C., Hokamp K., Fitzpatrick D. J., Konstantinov N. K., Welty J. S.,  
1189 Ness S. A., Werner-Washburne M., Fleming A. B., Osley M. A. (2017) Distinct  
1190 histone methylation and transcription profiles are established during the development  
1191 of cellular quiescence in yeast. *BMC Genomics* 18: 107
- 1192 Young N. L., DiMaggio P. A., Plazas-Mayorca M. D., Baliban R. C., Floudas C. A.,  
1193 Garcia B. A. (2009) High throughput characterization of combinatorial histone codes.  
1194 *Mol Cell Proteomics* 8: 2266-2284
- 1195 Yue W. W., Hassler M., Roe S. M., Thompson-Vale V., Pearl L. H. (2007) Insights  
1196 into histone code syntax from structural and biochemical studies of CARM1  
1197 methyltransferase. *EMBO J* 26: 4402-4412
- 1198 Zhang M., Wang C., Otto T. D., Oberstaller J., Liao X., Adapa S. R., Udenze K.,  
1199 Bronner I. F., Casandra D., Mayho M. *et al.* (2018) Uncovering the essential genes  
1200 of the human malaria parasite *Plasmodium falciparum* by saturation mutagenesis.  
1201 *Science* 360
- 1202 Zhao B., Xu W., Rong B., Chen G., Ye X., Dai R., Li W., Chen J., Cai J., Song L. *et*  
1203 *al.* (2018) H3K14me3 genomic distributions and its regulation by KDM4 family  
1204 demethylases. *Cell Res* 28: 1118-1120
- 1205 Zhao Y., Garcia B. A. (2015) Comprehensive catalog of currently documented  
1206 histone modifications. *Cold Spring Harb Perspect Biol* 7: a025064
- 1207 Zheng Y., Sweet S. M., Popovic R., Martinez-Garcia E., Tipton J. D., Thomas P. M.,  
1208 Licht J. D., Kelleher N. L. (2012) Total kinetic analysis reveals how combinatorial  
1209 methylation patterns are established on lysines 27 and 36 of histone H3. *Proc Natl*  
1210 *Acad Sci U S A* 109: 13549-13554
- 1211
- 1212

## 1213 Figure legends

### 1214 **Figure 1. Middle-down MS workflow for analysis of *P. falciparum* parasite. (A)**

1215 The stage composition of the three-biological stage analysed in this study and  
1216 representative morphology. Trophozoites (mean  $\pm$  SEM) samples contained a small  
1217 percentage of ring (R) and schizont (S) stages, while the stage III samples (mean  $\pm$   
1218 SD) contained stage I (I), II (II), III (III) and IV (IV), while stage V samples (mean  $\pm$   
1219 SD) consisted of stage III, IV and V gametocytes. The trophozoites were from three  
1220 independent biological repeats and gametocyte stages from two independent  
1221 biological repeats. **(B)** The middle-down proteomics workflow. Histones were  
1222 enriched from trophozoite, stage III and stage V gametocytes and digested using  
1223 endoprotease GluC which cleaves at the C-terminal of glutamic acid residues,  
1224 generating an intact N-terminal histone H3 peptides (50 amino acid residues in  
1225 length). To allow sample loading in aqueous buffer and for the most efficient  
1226 separation for histone N-terminal tails, nano liquid chromatography equipped with a  
1227 two-column system consisting with a C18-AQ trap column and a weak cation  
1228 exchange-hydrophilic interaction chromatography (WCX-HILIC) resin analytical  
1229 column coupled online with high resolution tandem mass spectrometry (MS-MS)  
1230 fragmentation was performed using electron transfer dissociation (ETD). Spectra  
1231 were identified using the Mascot and peptides were quantified using isoScale. The  
1232 flask image was adapted from the image from Servier Medical Art  
1233 (<http://smart.servier.com/>). Servier Medical Art is licensed under a Creative  
1234 Commons Attribution 3.0 License (CC BY 3.0 license: <https://creativecommons.org/licenses/by/3.0/>). Data processing and analysis workflow involved MS spectral  
1235 deconvolution using Xtract (Thermo Fisher Scientific) followed by database  
1236 searching using Mascot (Matrix Science, UK) with files generated from PlasmoDB  
1237 (<https://plasmodb.org/>) and subsequent removal of ambiguously mapped PTMs and  
1238 stringent quantification (including co-fragmented isobaric species) using IsoScale  
1239 Slim (<http://middle-down.github.io/Software>). The relative abundance of an individual  
1240 PTM (PTM1/2) is calculated by summing the relative abundances of all proteoforms  
1241 carrying the specific individual PTM. The interplay between two individual  
1242 modifications is calculated by dividing the observed abundance of bivalent PTMs  
1243 (FPTM1PTM2) with the predicted frequency of a combinatorial PTM (FPTM1 x  
1244 FPTM2). FPTM1PTM2 is calculated by summing the relative abundances of all  
1245 proteoforms carrying both PTMs.  
1246

1247

### 1248 **Figure 2. The relative abundances of individual PTMs on histone H3 and 1249 variant histone H3.3 from *P. falciparum* trophozoite, immature and mature 1250 gametocytes.**

1251 The histone PTM landscape as shown for histone H3, H3.3 and  
1252 H2B.Z (Fig EV2). A total of 83 PTMs on histone H3, variant histones H3.3 and H2B.Z  
1253 were identified across all stages, including 72 quantitative (circle) and 12 qualitative  
1254 histone PTMs (triangle) of which 35 were novel and detected for the first time in *P.*  
1255 *falciparum* parasites (grey shaded). Abbreviations denote the PTM which included  
1256 mainly acetylation (ac) and mono-, di- and trimethylation methylation (me1, me2 and  
1257 me3, respectively) and phosphorylation (ph). The N-terminal peptide fragmented for  
analysis is shown with corresponding amino acid sequence. The relative

1258 abundances of the individual histone PTMs on histone H3 and histone variant H3.3,  
1259 showing relative abundances on the different histone positions with either acetylated  
1260 (teal), monomethylation (me1, light purple), dimethylation (me2, medium purple) and  
1261 trimethylation (me3, dark purple). Data are from >2 independent biological repeats,  
1262 mean  $\pm$  SEM.

1263 **Figure 3. Prominent combinatorial histone PTM reorganization in *P. falciparum***  
1264 **parasites and gametocytes. (A)** Violin plots show the distribution of the number of  
1265 PTMs that are present on histone H3 and variant H3 tails where the dotted line  
1266 indicated the upper and lower quartiles and the solid line indicating the median. The  
1267 lower limit represents an unmodified histone tail. T: Trophozoite; SIII: Stage III and  
1268 SV: Stage V gametocyte. **(B)** The Venn diagram indicates combinatorial peptides  
1269 shared between the three stages from histone H3 and H3.3 were relatively unique to  
1270 each stage (trophozoites, grey; stage III, blue; stage V, pink) sharing only 9 % and 3  
1271 % of combinatorial peptides, respectively. **(C)** The co-existing histone PTMs  
1272 observed on histone H3 and H3.3 for trophozoites, stage III and stage V  
1273 gametocytes are visualised as ring plots where the nodes are the histone PTMs  
1274 while the edges represent the connection to another co-existing partner PTM. All  
1275 combinations are included in the supplementary data. The arrows represent the start  
1276 of the most connected PTM (left) toward least connected (right) in a clockwise  
1277 direction. The co-existence of H3K9ac with H3K4me3, H3K14ac with H3K4me3 and  
1278 H3K9ac with H3K14ac are highlighted with red edges in the trophozoite stage. The  
1279 arrows indicate the most prevalent PTM to the least prevalent PTM in co-existence.

1280

1281 **Figure 4. Histone modification crosstalk conserved across life cycle stages in**  
1282 ***P. falciparum*. (A)** Interplay scores for PTM combinations consistently present in all  
1283 life cycle stages analysed. Heatmaps shows k-means clustering (complete, k=4) of  
1284 the overlapping 35 % or 68 bivalent combinations and the respective interplay scores  
1285 shared between all three stages. The average interplay scores are summarised for  
1286 each cluster. **(B)** Interplay scores in cluster 4 across the life cycle stages, and PTMs  
1287 that show enrichment within these clusters are quantified with an enrichment score.  
1288 An enrichment score percentage (ES %) is shown for the top PTMs that are over-  
1289 represented in each cluster. The enrichment score is calculated by dividing the total  
1290 number of times a given PTM is present by the total number of combinations in the  
1291 cluster. Selected crosstalk partner PTMs are indicated, with all the combinations  
1292 provided in Fig EV4.

1293

1294 **Figure 5. Dynamic, stage-stratified histone modification crosstalk in *P.***  
1295 ***falciparum* parasites.** Interplay scores between bivalent PTMs occurring in **(A)**  
1296 trophozoites, **(B)** immature gametocytes and **(C)** mature stage gametocytes where  
1297 the colour intensity of the square is proportional to the interplay score. Ring plots  
1298 indicate top and bottom 10 bivalent combinations, where the colour of the edges are  
1299 proportional to the interplay score shown in the heatmap. Interplay scores for  
1300 trophozoites include the unique 4 % and the overlapping 6 % with immature

1301 gametocytes (I\_GC) and 1 % with mature gametocytes (M\_GC). Interplay scores for  
1302 immature gametocytes include the unique 25 % and the overlapping 6 % with  
1303 trophozoites and 25 % with mature gametocytes. Interplay scores for mature  
1304 gametocytes include the unique 6% and the overlapping 4 % with trophozoites and  
1305 25 % with immature gametocytes.

1306

1307 **Figure 6. Proteins identified by chromatin proteomic profiling that are**  
1308 **associated with H3K18ac and H3K23ac in mature stage gametocytes. (A)** After  
1309 parasite DNA and proteins were crosslinked, nuclei were isolated, and chromatin  
1310 sonicated. Chromatin complexes were immunoprecipitated with antibodies raised  
1311 against histone PTMs H3K18ac and H3K23ac. Crosslinks were reversed, and  
1312 proteins trypsin digested. Peptides were fractionated with CID for MS analysis.  
1313 NanoLC-MS/MS was performed, followed by database searching using Thermo  
1314 Proteome Discoverer (v.1.4.1.14) to extract peaks, Scaffold™ (v.4.5.3) to validate  
1315 and quantify peptides, Mascot (v.2.5.1) to identify proteins, and proteins identified  
1316 searches using databases PlasmoDB (v.46) and UniProt (2020\_01). Proteins were  
1317 quantified using iBAQ values. Images were adapted from Servier Medical Art (URL  
1318 link to the license: <https://creativecommons.org/licenses/by/3.0/>) and changes were  
1319 made in terms of colour, size and composition. Scatter plot of the **(B)** H3K18ac and  
1320 **(C)** H3K23ac-associated proteome enrichment in the ChIP-MS. A total number of  
1321 282 proteins were identified in the preparations, with several proteins showing  
1322 positive log<sub>2</sub>-fold change normalized to the negative control IgG ChIP. Proteins that  
1323 are shared between the H3K18ac and H3K23ac samples include transcription factor  
1324 AP2-G2 (PF3D7\_1408200), a conserved unknown function protein  
1325 (PF3D7\_1239800) and centrin-2 (PF3D7\_1446600) as shown in pink. H3K23ac also  
1326 includes nucleosome assembly protein (PF3D7\_0919000, NAPS), DNA/RNA-binding  
1327 protein Alba 1 (PF3D7\_0814200, Alba1), karyopherin beta (PF3D7\_0524000),  
1328 DNA/RNA-binding protein Alba 3 (PF3D7\_1006200), 14-3-3 protein  
1329 (PF3D7\_0818200, 14-3-3I), mature parasite-infected erythrocyte surface antigen  
1330 (PF3D7\_0500800, MESA). **(D)** A schematic model of the protein-protein interaction  
1331 complex manually curated and placed in a network based on evidence identified in  
1332 this study, a AP2-G2 peptide pulldown study (Singh *et al.*, 2020) and a GCN5  
1333 pulldown (Hoeijmakers *et al.*, 2019), previous yeast two hybrid protein interactions  
1334 (La Count *et al.*, 2005) and STRING interactions. Shown in grey blocks are  
1335 interactions that include the transcriptional coactivator ADA2 (PF3D7\_1014600,  
1336 ADA2), histone acetyltransferase GCN5 (PF3D7\_0823300, GCN5), chromodomain-  
1337 helicase-DNA-binding protein 1 homolog (PF3D7\_1023900, CHD1), ISWI chromatin-  
1338 remodelling complex ATPase (PF3D7\_0624600, ISWI), Snf2-related CBP activator  
1339 (PF3D7\_0820000, SNF/CBP), chromatin assembly factor 1 subunit A  
1340 (PF3D7\_0501800, CAF1A), and PHD finger protein PHD2 (PF3D7\_1433400,  
1341 PHD2). Grey dots represent other proteins that associate to the respective proteins  
1342 but are inconsequential. Proteins shown in pink blocks are shared between the  
1343 H3K18ac and H3K23ac samples include transcription factor AP2-G2  
1344 (PF3D7\_1408200), nucleosome assembly protein (PF3D7\_0919000, NAPS), a  
1345 conserved unknown function protein (PF3D7\_1239800) and mature parasite-infected



1346 erythrocyte surface antigen (PF3D7\_0500800, MESA). Black edges represent data  
1347 from the AP2-G2 and GCN5 interactomes (Singh *et al.*, 2020 and Hoeijmakers *et al.*,  
1348 2019); the pink line represent data from STRING [([STRING: functional protein  
1349 association networks \(string-db.org\)](#))]; and the blue line indicated data from a yeast to  
1350 hybrid study (La Count *et al.*, 2005).

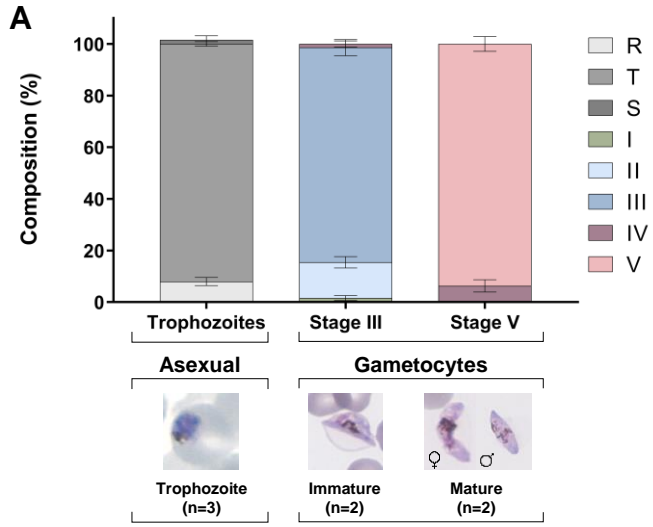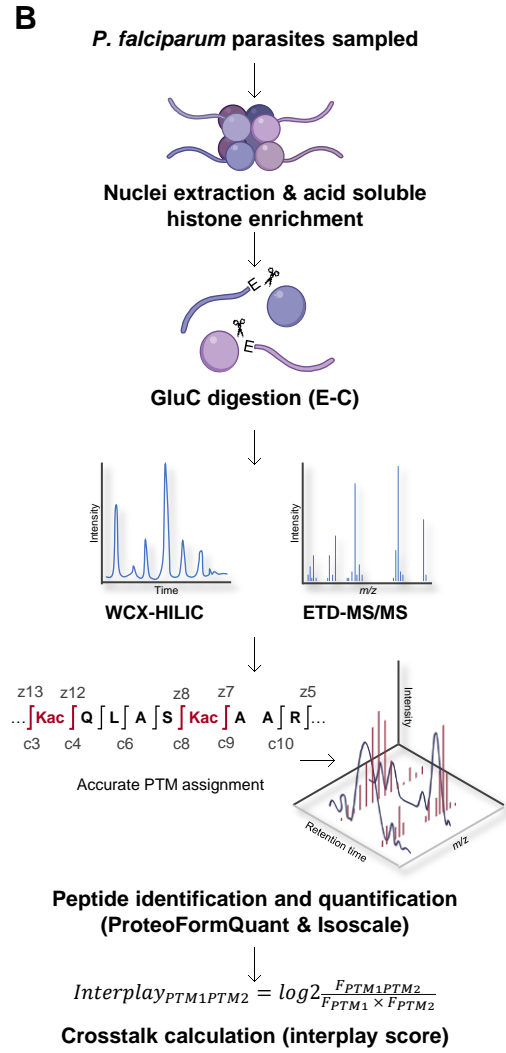

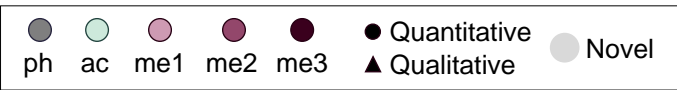

### H3

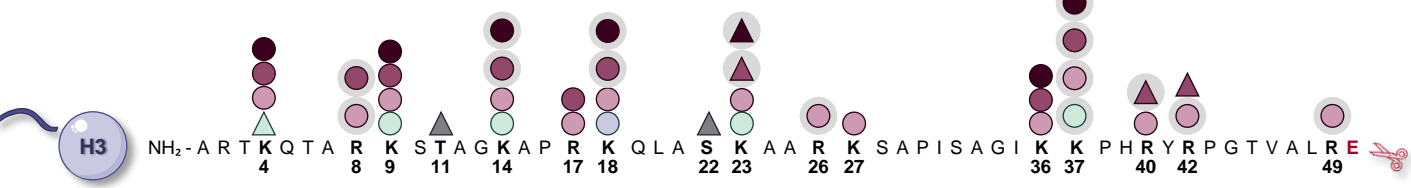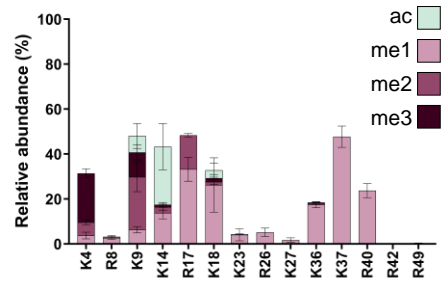

Trophozoite

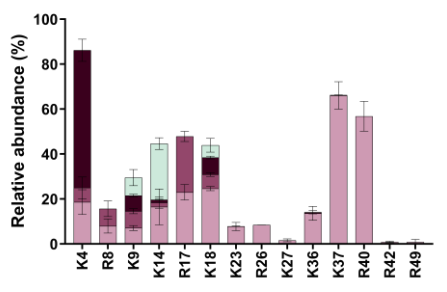

Immature\_GC

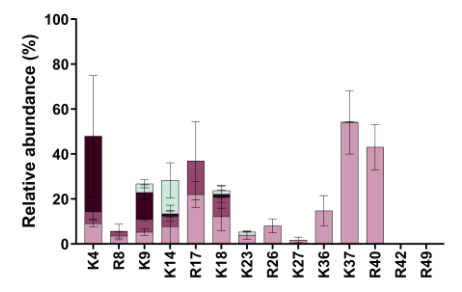

Mature\_GC

### H3.3

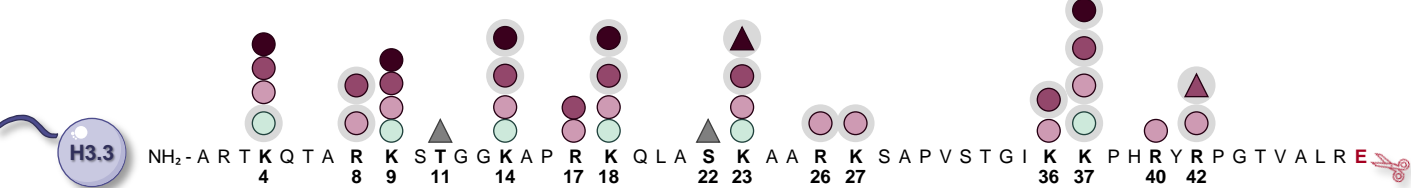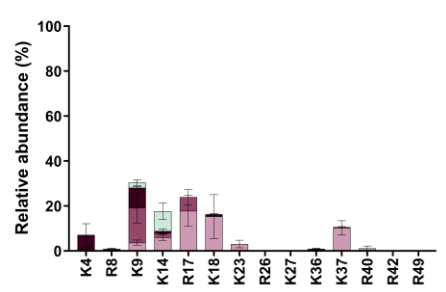

Trophozoite

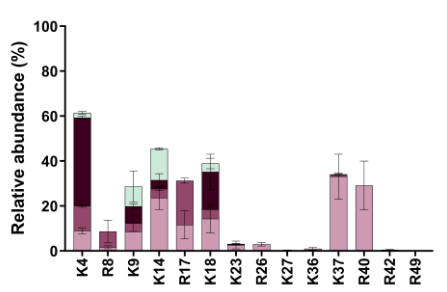

Immature\_GC

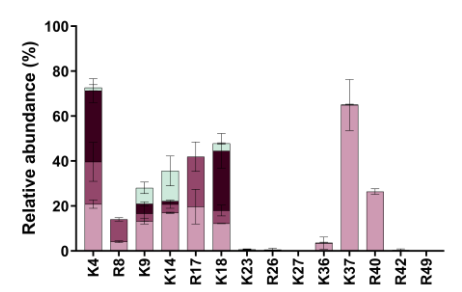

Mature\_GC

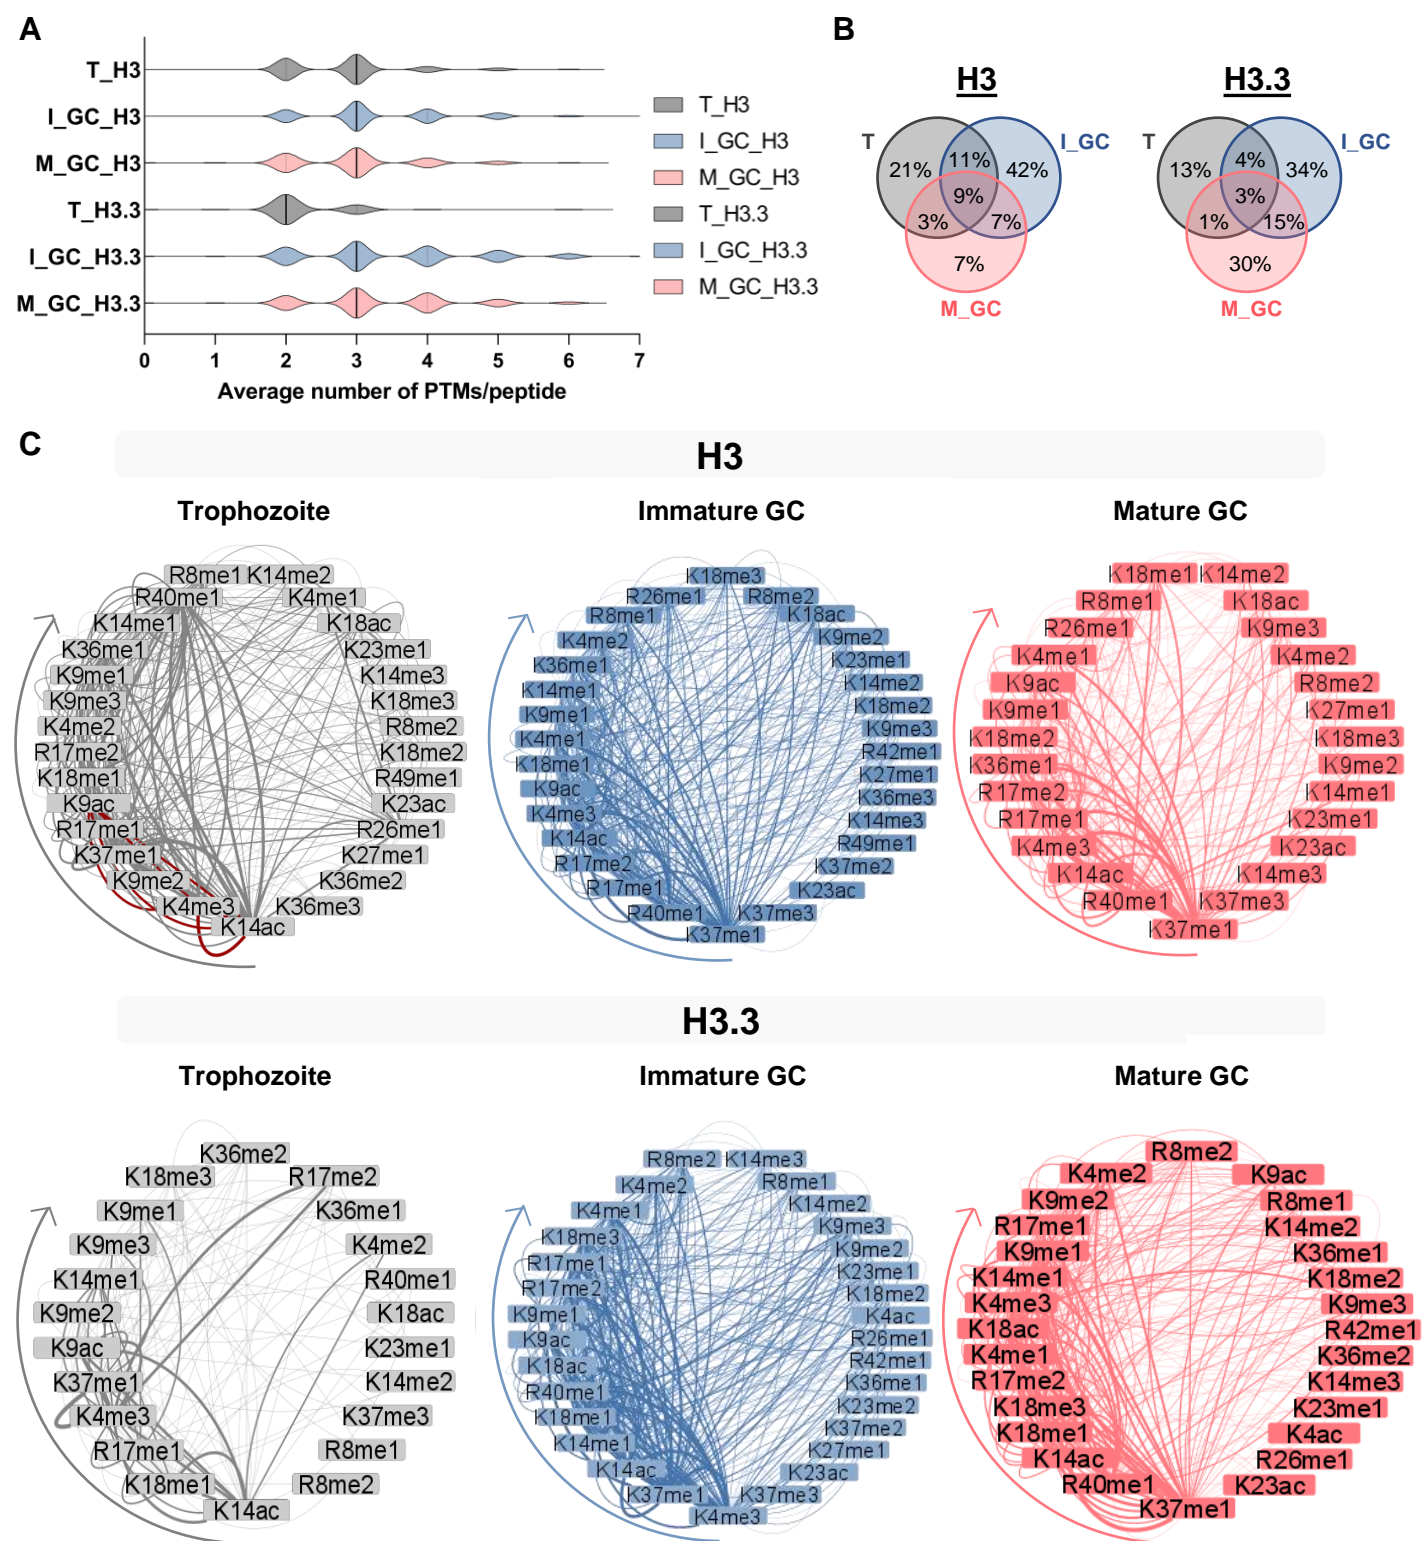

**A**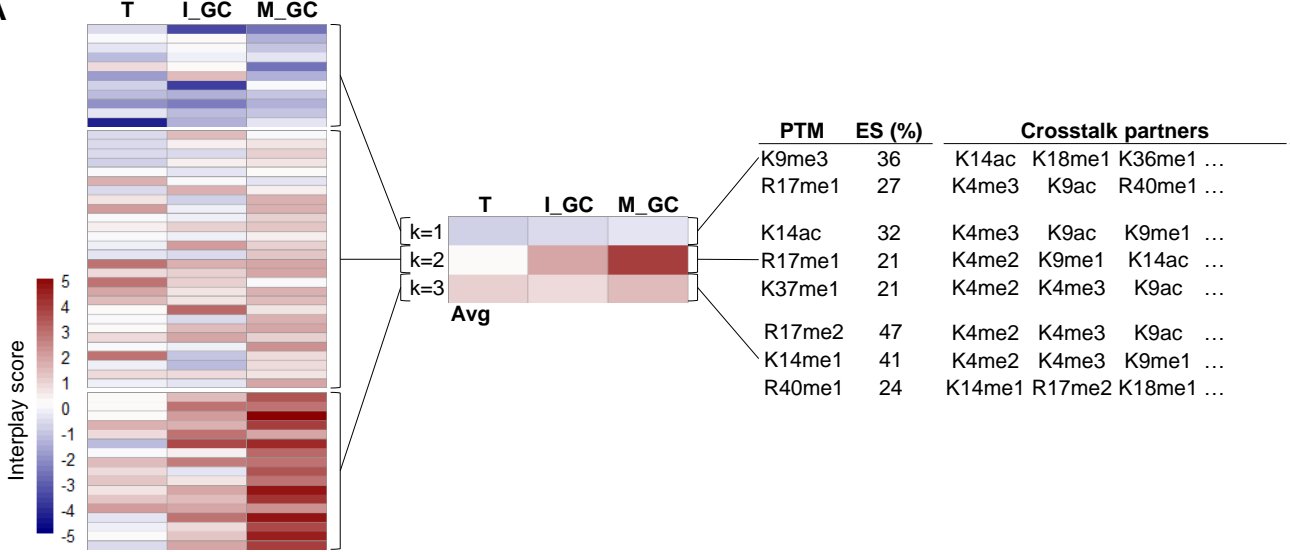**B**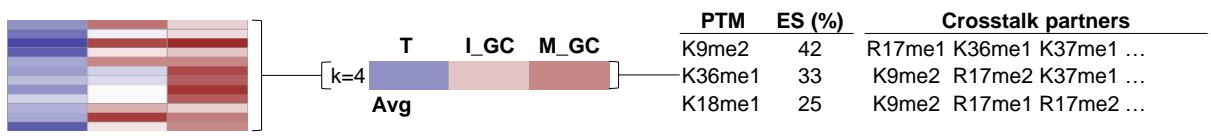

**A****Trophozoite**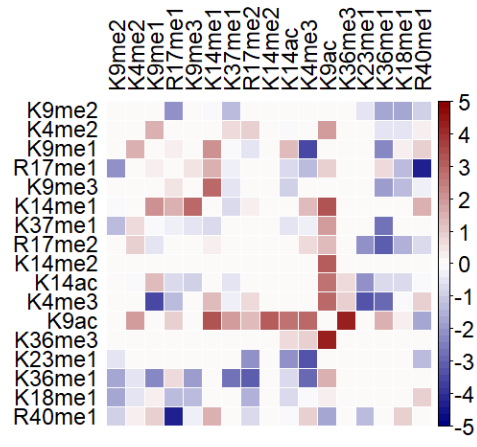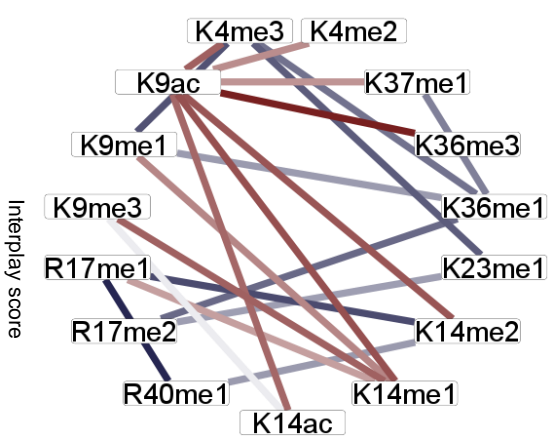**B****Immature gametocytes**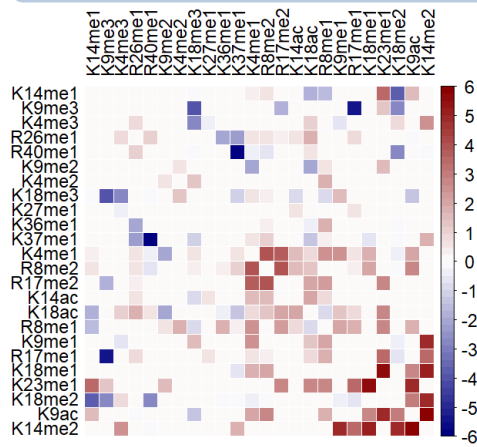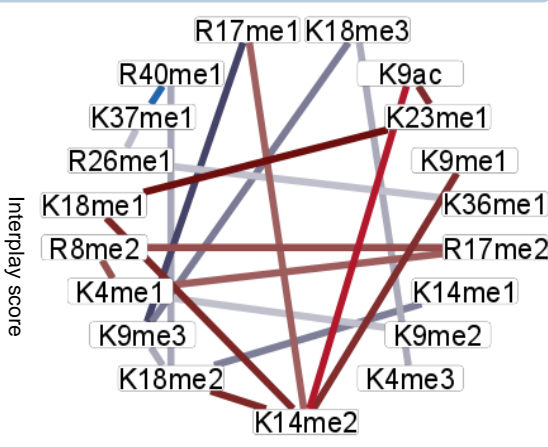**C****Mature gametocytes**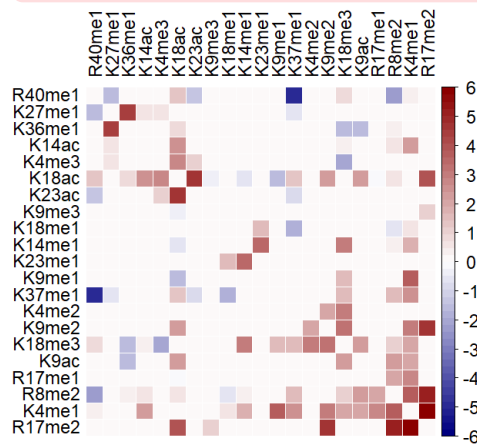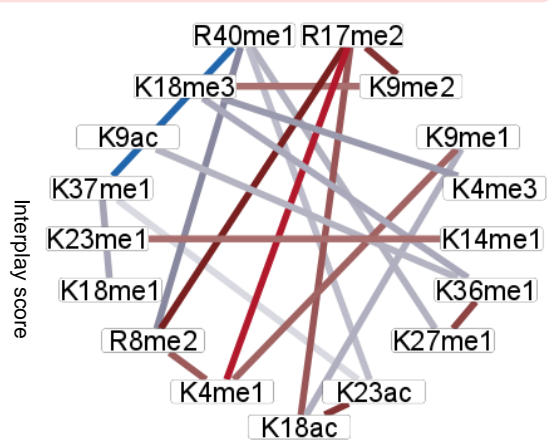

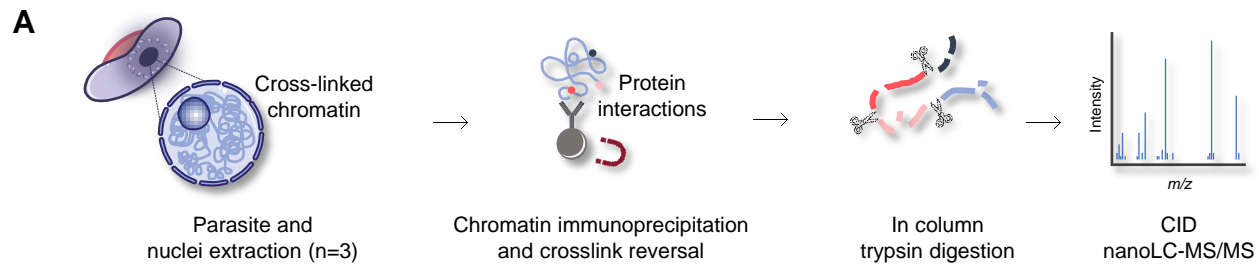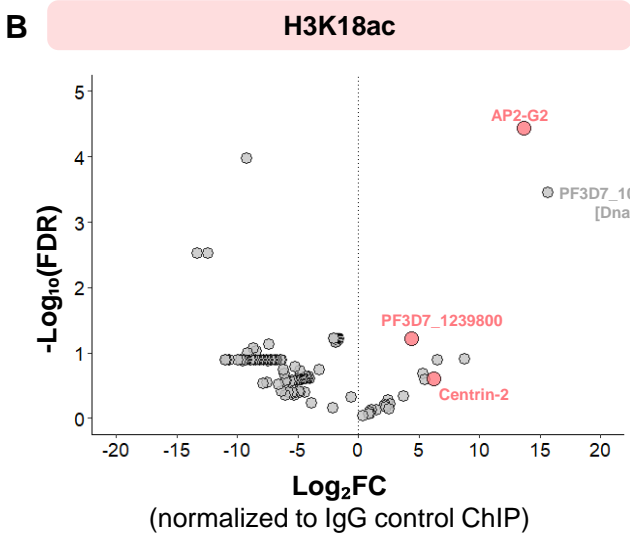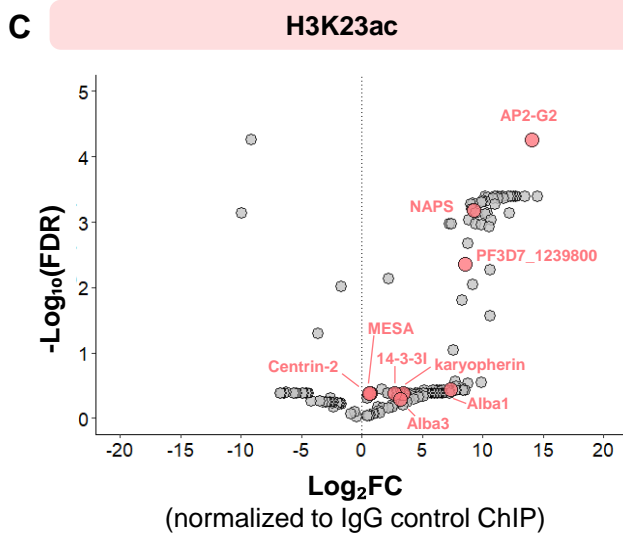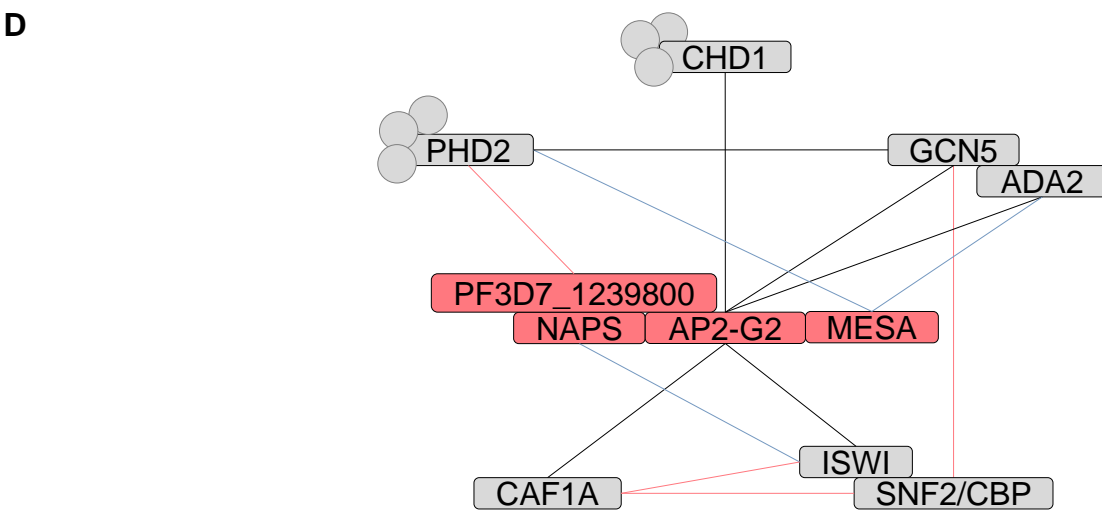

Source: https://www.biorxiv.org/content/10.1101/2021.07.19.452879v1.full.pdf
